# Supplementary material for: Exploration of silver borates with diverse low-dimensional anion frameworks by introducing monovalent heteroanions
Source: Royal Society of Chemistry journal article supplement (doi:10.1039/d4nj01687d), 2024-01-01
Supplement: d4nj01687d1.pdf [file d4nj01687d1.pdf]

## Supporting Information (SI)

### Exploration of Silver Borates with Diverse Low Dimensional Anion Frameworks by Introducing Monovalent Heteroanions

Lei Huai, Wenlong Liu,\* Bei-Bei Zhang, Ru-Ling Tang,\* Yi-Lei Lv, Yue-Qi Wei and Sheng-Ping Guo\*

*School of Chemistry and Chemical Engineering, Yangzhou University, Yangzhou, Jiangsu 225002, P. R. China.*

Corresponding authors: [liuwl@yzu.edu.cn](mailto:liuwl@yzu.edu.cn); [rltang@yzu.edu.cn](mailto:rltang@yzu.edu.cn); [spguo@yzu.edu.cn](mailto:spguo@yzu.edu.cn).

### Supporting Information Index

#### Tables and Figures

- 1) **Table S1.** Crystal Data and Structure Refinement Parameters.
- 2) **Table S2.** Important bond lengths (Å) for **(1)**, **(2)**, **(3)** and **(4)**.
- 3) **Table S3.** Selected bond angles (deg) for **(1)**, **(2)**, **(3)** and **(4)**.
- 4) **Table S4.** Fractional Atomic Coordinates ( $\times 10^4$ ) and Equivalent Isotropic Displacement Parameters ( $\text{Å}^2 \times 10^3$ ) for **(1)**, **(2)**, **(3)** and **(4)**.  $U_{eq}$  is defined as 1/3 of the trace of the orthogonalized  $U_{ij}$  tensor.
- 5) **Table S5.** Assignment of the absorption peaks observed in the IR spectra of **(1)**, **(2)**, **(3)** and **(4)**.
- 6) **Table S6.** Reported inorganic stoichiometric Ag-borates with B–O framework.
- 7) **Figure S1.** Rietveld refinement for the powder X-ray diffraction pattern of **(1)**.
- 8) **Figure S2.** Rietveld refinement for the powder X-ray diffraction pattern of **(2)**.
- 9) **Figure S3.** Rietveld refinement for the powder X-ray diffraction pattern of **(3)**.
- 10) **Figure S4.** Rietveld refinement for the powder X-ray diffraction pattern of **(4)**.
- 11) **Figure S5.** Asymmetric units of these compounds, and the coordination environments of atoms.
- 12) **Figure S7.** (a) 2D structure of **(2)** along the *ab* plane, (b) 12-MR channel, (c) 20-MR channel, and (d) 16-MR channel.
- 13) **Figure S7.** (a) 2D structure of **(3)** along the *ab* plane, (b) 12-MR channel, (c) 20-MR channel, and (d) 16-MR channel.
- 14) **Figure S8.** The calculated refractive indices of **(1)**, **(2)**, **(3)** and **(4)**.

**Table S1** Crystal Data and Structure Refinement Parameters.

| Compounds                                                           | (1)                                                                 | (2)                                                                 | (3)                                                                 | (4)                                                                 |
|---------------------------------------------------------------------|---------------------------------------------------------------------|---------------------------------------------------------------------|---------------------------------------------------------------------|---------------------------------------------------------------------|
| Empirical formula                                                   | Ag <sub>7</sub> B <sub>9</sub> O <sub>16</sub> (OH) <sub>2</sub>    | Ag <sub>8</sub> B <sub>8</sub> O <sub>15</sub> Cl <sub>2</sub>      | Ag <sub>8</sub> B <sub>8</sub> O <sub>15</sub> (OH)Br               | Ag <sub>11</sub> B <sub>8</sub> O <sub>16</sub> I <sub>3</sub>      |
| <i>Mr</i> (g·mol <sup>-1</sup> )                                    | 1142.40                                                             | 1260.34                                                             | 1286.36                                                             | 1909.75                                                             |
| Cryst syst.                                                         | Monoclinic                                                          | Monoclinic                                                          | Triclinic                                                           | Monoclinic                                                          |
| <i>T</i> (K)                                                        |                                                                     |                                                                     | 296                                                                 |                                                                     |
| Space group                                                         | <i>C2/c</i>                                                         | <i>C2/c</i>                                                         | <i>P</i> $\bar{1}$                                                  | <i>C2/c</i>                                                         |
| <i>a</i> (Å)                                                        | 8.826(4)                                                            | 13.7794(8)                                                          | 8.7338(3)                                                           | 13.4121(5)                                                          |
| <i>b</i> (Å)                                                        | 8.825(3)                                                            | 10.7272(6)                                                          | 8.8080(3)                                                           | 12.5734(4)                                                          |
| <i>c</i> (Å)                                                        | 20.483(9)                                                           | 21.5856(12)                                                         | 10.8986(3)                                                          | 25.1948(9)                                                          |
| $\alpha$ (°)                                                        | 90                                                                  | 90                                                                  | 79.573(10)                                                          | 90                                                                  |
| $\beta$ (°)                                                         | 100.220(2)                                                          | 95.604(2)                                                           | 89.317(10)                                                          | 93.062(10)                                                          |
| $\gamma$ (°)                                                        | 90                                                                  | 90                                                                  | 75.242(10)                                                          | 90                                                                  |
| <i>V</i> (Å <sup>3</sup> )                                          | 1570.10(11)                                                         | 3175.40(3)                                                          | 796.84(4)                                                           | 4242.70(3)                                                          |
| <i>Z</i>                                                            | 4                                                                   | 8                                                                   | 2                                                                   | 8                                                                   |
| <i>D<sub>c</sub></i> (g·cm <sup>-3</sup> )                          | 4.833                                                               | 5.273                                                               | 5.361                                                               | 5.980                                                               |
| $\mu$ (mm <sup>-1</sup> )                                           | 8.653                                                               | 10.071                                                              | 12.212                                                              | 14.354                                                              |
| <i>F</i> (000)                                                      | 2080.0                                                              | 4560.0                                                              | 1160.0                                                              | 6752.0                                                              |
| <i>R</i> <sub>int</sub>                                             | 0.0322                                                              | 0.0718                                                              | 0.0313                                                              | 0.0275                                                              |
| Radiation                                                           | MoK $\alpha$ ( $\lambda$ = 0.71073)                                 |                                                                     |                                                                     |                                                                     |
| $2\theta$ range for data collection/ <sup>o</sup>                   | 5.038 to 55.002                                                     | 3.792 to 55.062                                                     | 4.826 to 54.966                                                     | 3.238 to 55.068                                                     |
| Index ranges                                                        | -11 ≤ <i>h</i> ≤ 9,<br>-11 ≤ <i>k</i> ≤ 10,<br>-26 ≤ <i>l</i> ≤ 26  | -15 ≤ <i>h</i> ≤ 17,<br>-13 ≤ <i>k</i> ≤ 13,<br>-28 ≤ <i>l</i> ≤ 27 | -11 ≤ <i>h</i> ≤ 11,<br>-11 ≤ <i>k</i> ≤ 11,<br>-14 ≤ <i>l</i> ≤ 14 | -17 ≤ <i>h</i> ≤ 16,<br>-16 ≤ <i>k</i> ≤ 16,<br>-32 ≤ <i>l</i> ≤ 32 |
| Reflns collected                                                    | 7797                                                                | 15737                                                               | 14123                                                               | 32864                                                               |
| GOF on <i>F</i> <sup>2</sup>                                        | 1.030                                                               | 1.041                                                               | 1.022                                                               | 1.075                                                               |
| Final <i>R</i> indexes<br>[ <i>I</i> > 2σ( <i>I</i> )] <sup>a</sup> | <i>R</i> <sub>1</sub> = 0.0280,<br>w <i>R</i> <sub>2</sub> = 0.0556 | <i>R</i> <sub>1</sub> = 0.0438,<br>w <i>R</i> <sub>2</sub> = 0.0514 | <i>R</i> <sub>1</sub> = 0.0233,<br>w <i>R</i> <sub>2</sub> = 0.0455 | <i>R</i> <sub>1</sub> = 0.0219,<br>w <i>R</i> <sub>2</sub> = 0.0398 |
| Final <i>R</i> indexes<br>[all data] <sup>a</sup>                   | <i>R</i> <sub>1</sub> = 0.0384,<br>w <i>R</i> <sub>2</sub> = 0.0592 | <i>R</i> <sub>1</sub> = 0.0886,<br>w <i>R</i> <sub>2</sub> = 0.0580 | <i>R</i> <sub>1</sub> = 0.0307,<br>w <i>R</i> <sub>2</sub> = 0.0480 | <i>R</i> <sub>1</sub> = 0.0272,<br>w <i>R</i> <sub>2</sub> = 0.0412 |

<sup>a</sup>*R*<sub>1</sub> =  $\sum ||F_o| - |F_c|| / \sum |F_o|$  and w*R*<sub>2</sub> =  $[w(F_o^2 - F_c^2)^2 / wF_o^4]^{1/2}$  for *F*<sub>o</sub><sup>2</sup> > 2σ(*F*<sub>o</sub><sup>2</sup>)

**Table S2(a).** Important bond lengths for (1).

| <b>Bond Length(Å) for (1)</b> |          |                           |          |
|-------------------------------|----------|---------------------------|----------|
| B(1)—O(1)                     | 1.353(6) | B(1)—O(2)                 | 1.403(6) |
| B(1)—O(3)                     | 1.380(6) | B(2)—O(2)                 | 1.501(6) |
| B(2)—O(4)                     | 1.454(6) | B(2)—O(5) <sup>13</sup>   | 1.454(6) |
| B(2)—O(7) <sup>13</sup>       | 1.495(6) | B(2) <sup>11</sup> —O(5)  | 1.454(6) |
| B(2) <sup>11</sup> —O(7)      | 1.495(6) | B(3)—O(3)                 | 1.491(6) |
| B(3)—O(4)                     | 1.461(6) | B(3)—O(5)                 | 1.482(6) |
| B(3)—O(6)                     | 1.468(6) | B(4)—O(6)                 | 1.382(6) |
| B(4)—O(7)                     | 1.388(6) | B(4)—O(8)                 | 1.363(6) |
| B(5)—O(8) <sup>3</sup>        | 1.495(5) | B(5)—O(8)                 | 1.495(5) |
| B(5)—O(9) <sup>3</sup>        | 1.459(5) | B(5)—O(9)                 | 1.459(6) |
| Ag(1)—O(2)                    | 2.139(3) | Ag(1)—O(2) <sup>10</sup>  | 2.139(3) |
| Ag(2) <sup>9</sup> —O(1)      | 2.174(4) | Ag(2)—O(1) <sup>6</sup>   | 2.174(4) |
| Ag(2)—O(5)                    | 2.300(3) | Ag(2)—O(7)                | 2.652    |
| Ag(2)—O(9)                    | 2.665    | Ag(3)—O(4)                | 2.232(3) |
| Ag(3)—O(5) <sup>2</sup>       | 2.507(3) | Ag(3)—O(7) <sup>3</sup>   | 2.536(3) |
| Ag(3)—O(9) <sup>4</sup>       | 2.348(4) | Ag(3) <sup>2</sup> —O(5)  | 2.507(3) |
| Ag(3) <sup>3</sup> —O(7)      | 2.536(3) | Ag(3) <sup>12</sup> —O(9) | 2.348(4) |
| Ag(4)—O(1) <sup>8</sup>       | 2.349(4) | Ag(4)—O(1) <sup>9</sup>   | 2.507(4) |
| Ag(4) <sup>8</sup> —O(1)      | 2.349(4) | Ag(4) <sup>6</sup> —O(1)  | 2.507(4) |
| Ag(4)—O(6)                    | 2.499(3) |                           |          |

<sup>1</sup> -x, +y, 1/2-z; <sup>2</sup> 1/2-x, 1/2-y, 1/2-z; <sup>3</sup> 1-x, +y, 1/2-z; <sup>4</sup> -1/2+x, 3/2-y, +z; <sup>5</sup> +x, -1+y, +z;

<sup>6</sup> 1/2-x, -1/2+y, -z; <sup>7</sup> +x, 1+y, +z; <sup>8</sup> -x, 1-y, -z; <sup>9</sup> 1/2-x, 1/2+y, -z; <sup>10</sup> -x, -y, -z;

<sup>11</sup> 1/2+x, 1/2-y, +z; <sup>12</sup> 1/2+x, 3/2-y, +z; <sup>13</sup> -1/2+x, 1/2-y, +z

**Table S2(b).** Important bond lengths for **(2)**.

| <b>Bond Length(Å) for (2)</b> |           |                           |          |
|-------------------------------|-----------|---------------------------|----------|
| B(1)—O(13)                    | 1.365(9)  | B(1)—O(14)                | 1.365(9) |
| B(1)—O(15)                    | 1.358(10) | B(2)—O(12)                | 1.461(8) |
| B(2)—O(12) <sup>5</sup>       | 1.461(8)  | B(2)—O(13)                | 1.494(9) |
| B(2)—O(13) <sup>5</sup>       | 1.494(9)  | B(3)—O(6)                 | 1.477(9) |
| B(3)—O(7)                     | 1.462(9)  | B(3)—O(12)                | 1.459(9) |
| B(3)—O(14)                    | 1.509(9)  | B(4)—O(5)                 | 1.472(9) |
| B(4)—O(7)                     | 1.472(9)  | B(4)—O(8)                 | 1.491(9) |
| B(4)—O(11)                    | 1.434(9)  | B(5)—O(3)                 | 1.478(9) |
| B(5)—O(4)                     | 1.497(9)  | B(5)—O(5)                 | 1.458(9) |
| B(5)—O(6)                     | 1.458(9)  | B(6)—O(2)                 | 1.475(8) |
| B(6)—O(2) <sup>5</sup>        | 1.474(8)  | B(6)—O(3)                 | 1.455(8) |
| B(6)—O(3) <sup>5</sup>        | 1.455(8)  | B(7)—O(1)                 | 1.379(9) |
| B(7)—O(2)                     | 1.351(9)  | B(7)—O(4)                 | 1.375(9) |
| B(8) <sup>13</sup> —O(1)      | 1.472(9)  | B(8)—O(1) <sup>2</sup>    | 1.472(9) |
| B(8)—O(10)                    | 1.504(9)  | B(8)—O(11)                | 1.407(9) |
| B(8)—O(15) <sup>3</sup>       | 1.494(9)  | B(8) <sup>7</sup> —O(15)  | 1.494(9) |
| B(9)—O(8)                     | 1.362(10) | B(9)—O(9)                 | 1.333(9) |
| B(9)—O(10)                    | 1.392(9)  | Ag(1)—O(5) <sup>8</sup>   | 2.196(5) |
| Ag(1)—O(9)                    | 2.104(5)  | Ag(1)—Cl(2) <sup>9</sup>  | 2.923(2) |
| Ag(1) <sup>10</sup> —Cl(2)    | 2.923(2)  | Ag(1) <sup>8</sup> —O(5)  | 2.196(5) |
| Ag(2) <sup>6</sup> —Cl(1)     | 2.742(2)  | Ag(2) <sup>8</sup> —O(1)  | 2.439(5) |
| Ag(2) <sup>10</sup> —Cl(2)    | 2.772(2)  | Ag(2)—Cl(1) <sup>6</sup>  | 2.742(2) |
| Ag(2)—Cl(2) <sup>9</sup>      | 2.772(2)  | Ag(2)—O(1) <sup>8</sup>   | 2.439(5) |
| Ag(2)—O(10)                   | 2.311(5)  | Ag(3)—Cl(1)               | 2.556(2) |
| Ag(3)—O(6) <sup>4</sup>       | 2.489(5)  | Ag(3)—O(9)                | 2.316(5) |
| Ag(3)—O(14) <sup>4</sup>      | 2.361(5)  | Ag(3) <sup>4</sup> —O(14) | 2.361(5) |
| Ag(3) <sup>4</sup> —O(6)      | 2.489(5)  | Ag(4) <sup>6</sup> —Cl(1) | 2.670(2) |
| Ag(4) <sup>12</sup> —Cl(2)    | 2.819(2)  | Ag(4)—Cl(1) <sup>6</sup>  | 2.670(2) |
| Ag(4)—Cl(1)                   | 2.632(2)  | Ag(4)—O(7)                | 2.320(5) |
| Ag(4)—Cl(2) <sup>11</sup>     | 2.819(2)  | Ag(5) <sup>4</sup> —O(8)  | 2.521(5) |

|                           |           |                           |          |
|---------------------------|-----------|---------------------------|----------|
| Ag(5) <sup>4</sup> —O(4)  | 2.420(5)  | Ag(5)—Cl(1)               | 2.774(2) |
| Ag(5)—O(4) <sup>4</sup>   | 2.420(5)  | Ag(5)—O(15)               | 2.448(5) |
| Ag(5)—O(8) <sup>4</sup>   | 2.521(5)  | Ag(6)—O(3) <sup>11</sup>  | 2.317(4) |
| Ag(6)—O(7)                | 2.306(5)  | Ag(6)—O(12)               | 2.580(5) |
| Ag(6) <sup>12</sup> —O(3) | 2.317(4)  | Ag(7)—O(6)                | 2.320(4) |
| Ag(7)—O(3) <sup>5</sup>   | 2.451(4)  | Ag(7)—O(12) <sup>5</sup>  | 2.388(5) |
| Ag(7)—Cl(2) <sup>5</sup>  | 2.545(19) | Ag(7) <sup>5</sup> —O(12) | 2.388(5) |
| Ag(7) <sup>5</sup> —O(3)  | 2.451(4)  | Ag(8) <sup>13</sup> —O(2) | 2.458(5) |
| Ag(8) <sup>7</sup> —O(13) | 2.388(5)  | Ag(8)—O(2) <sup>2</sup>   | 2.458(5) |
| Ag(8)—O(11)               | 2.311(5)  | Ag(8)—O(13) <sup>3</sup>  | 2.388(5) |
| Ag(8)—Cl(2)               | 2.519(2)  |                           |          |

<sup>1</sup> -x, +y, 1/2-z; <sup>2</sup> -1/2+x, -1/2+y, +z; <sup>3</sup> -1/2+x, 1/2+y, +z; <sup>4</sup> 1-x, 1-y, 1-z; <sup>5</sup> 1-x, +y, 1/2-z;  
<sup>6</sup> 1/2-x, 1/2-y, 1-z; <sup>7</sup> 1/2+x, -1/2+y, +z; <sup>8</sup> 1/2-x, 3/2-y, 1-z; <sup>9</sup> +x, 1-y, 1/2+z; <sup>10</sup> +x, 1-y, -1/2+z;  
<sup>11</sup> 1/2-x, -1/2+y, 1/2-z; <sup>12</sup> 1/2-x, 1/2+y, 1/2-z; <sup>13</sup> 1/2+x, 1/2+y, +z

**Table S2(c).** Important bond lengths for **(3)**.

| <b>Bond Length(Å) for (3)</b> |           |                            |           |
|-------------------------------|-----------|----------------------------|-----------|
| B(1)—O(1)                     | 1.497(6)  | B(1)—O(2)                  | 1.478(5)  |
| B(1)—O(3)                     | 1.441(6)  | B(1) <sup>13</sup> —O(13)  | 1.479(6)  |
| B(1)—O(13) <sup>1</sup>       | 1.479(6)  | B(2)—O(3)                  | 1.448(6)  |
| B(2)—O(4)                     | 1.476(6)  | B(2)—O(6)                  | 1.443(6)  |
| B(2)—O(7)                     | 1.504(6)  | B(3)—O(4)                  | 1.371(6)  |
| B(3)—O(5)                     | 1.392(6)  | B(3)—O(15) <sup>16</sup>   | 1.344(6)  |
| B(3) <sup>16</sup> —O(15)     | 1.344(6)  | B(4)—O(5)                  | 1.486(6)  |
| B(4)—O(6)                     | 1.423(5)  | B(4)—O(9)                  | 1.493(6)  |
| B(4)—O(11)                    | 1.487(6)  | B(5)—O(8)                  | 1.369(6)  |
| B(5)—O(9)                     | 1.369(6)  | B(5)—O(10)                 | 1.369(6)  |
| B(6)—O(1) <sup>4</sup>        | 1.469(6)  | B(6)—O(7) <sup>4</sup>     | 1.466(6)  |
| B(6)—O(14) <sup>7</sup>       | 1.475(6)  | B(6)—O(10)                 | 1.502(5)  |
| B(6) <sup>2</sup> —O(1)       | 1.469(6)  | B(6) <sup>2</sup> —O(7)    | 1.466(6)  |
| B(6) <sup>7</sup> —O(14)      | 1.475(6)  | B(7)—O(11)                 | 1.365(6)  |
| B(7)—O(12)                    | 1.379(6)  | B(7)—O(13)                 | 1.360(6)  |
| B(8) <sup>1</sup> —O(2)       | 1.466(6)  | B(8)—O(2) <sup>13</sup>    | 1.466(6)  |
| B(8) <sup>7</sup> —O(8)       | 1.479(6)  | B(8)—O(8) <sup>7</sup>     | 1.479(6)  |
| B(8)—O(12)                    | 1.473(6)  | B(8)—O(14)                 | 1.463(6)  |
| Ag(1)—O(1)                    | 2.292(3)  | Ag(1)—O(2) <sup>3</sup>    | 2.477(3)  |
| Ag(1) <sup>13</sup> —O(14)    | 2.398(3)  | Ag(1)—O(14) <sup>1</sup>   | 2.398(3)  |
| Ag(1)—Br(1) <sup>3</sup>      | 2.6158(6) | Ag(1) <sup>3</sup> —Br(1)  | 2.6158(6) |
| Ag(2)—O(2) <sup>14</sup>      | 2.336(3)  | Ag(2) <sup>14</sup> —O(2)  | 2.337(3)  |
| Ag(2)—O(3)                    | 2.184(3)  | Ag(2)—Br(1) <sup>14</sup>  | 2.8618(7) |
| Ag(2) <sup>14</sup> —Br(1)    | 2.8618(7) | Ag(3)—O(10)                | 2.411(3)  |
| Ag(3)—O(11) <sup>6</sup>      | 2.452(3)  | Ag(3)—O(16) <sup>5</sup>   | 2.516(4)  |
| Ag(3) <sup>6</sup> —O(11)     | 2.452(3)  | Ag(3) <sup>11</sup> —O(16) | 2.516(4)  |
| Ag(4)—O(6)                    | 2.317(3)  | Ag(4)—O(8)                 | 2.513(3)  |
| Ag(4)—O(12)                   | 2.364(3)  | Ag(5)—O(7) <sup>8</sup>    | 2.567(3)  |
| Ag(5)—O(7)                    | 2.567(3)  | Ag(5)—O(14) <sup>8</sup>   | 2.325(3)  |
| Ag(5)—O(14)                   | 2.325(3)  | Ag(6)—O(7)                 | 2.151(3)  |
| Ag(6)—O(15)                   | 2.096(3)  | Ag(7)—O(1) <sup>13</sup>   | 2.389(3)  |

|                           |          |                           |          |
|---------------------------|----------|---------------------------|----------|
| Ag(7) <sup>1</sup> —O(1)  | 2.389(3) | Ag(7)—O(15)               | 2.287(4) |
| Ag(7)—O(16)               | 2.358(4) | Ag(8)—O(16) <sup>12</sup> | 2.101(4) |
| Ag(8)—O(16)               | 2.101(4) | Ag(9)—O(5) <sup>11</sup>  | 2.387(3) |
| Ag(9) <sup>5</sup> —O(5)  | 2.387(3) | Ag(9)—O(9) <sup>10</sup>  | 2.569(3) |
| Ag(9) <sup>10</sup> —O(9) | 2.569(3) | Ag(9)—O(16)               | 2.406(4) |

<sup>1</sup> -1+x, +y, +z; <sup>2</sup> +x, -1+y, +z; <sup>3</sup> -x, 1-y, 1-z; <sup>4</sup> +x, 1+y, +z; <sup>5</sup> -1+x, 1+y, +z;  
<sup>6</sup> 1-x, 2-y, 2-z; <sup>7</sup> 1-x, 2-y, 1-z; <sup>8</sup> 1-x, 1-y, 1-z; <sup>9</sup> 1+x, -1+y, 1+z; <sup>10</sup> 2-x, 1-y, 2-z;  
<sup>11</sup> 1+x, -1+y, +z; <sup>12</sup> 2-x, -y, 2-z; <sup>13</sup> 1+x, +y, +z; <sup>14</sup> -x, 2-y, 1-z; <sup>15</sup> -1+x, 1+y, -1+z; <sup>16</sup> 1-x, 1-y, 2-z

**Table S2(d).** Important bond lengths for **(4)**.

| <b>Bond lengths (Å) for (4)</b> |           |                           |           |
|---------------------------------|-----------|---------------------------|-----------|
| B(1)—O(1)                       | 1.343(6)  | B(1)—O(2)                 | 1.390(6)  |
| B(1)—O(3)                       | 1.377(6)  | B(2)—O(2)                 | 1.473(6)  |
| B(2)—O(4)                       | 1.465(5)  | B(2)—O(5) <sup>13</sup>   | 1.482(5)  |
| B(2)—O(14) <sup>12</sup>        | 1.479(5)  | B(2) <sup>9</sup> —O(14)  | 1.479(5)  |
| B(2) <sup>13</sup> —O(5)        | 1.482(5)  | B(3)—O(3)                 | 1.517(6)  |
| B(3)—O(4)                       | 1.449(5)  | B(3)—O(8)                 | 1.453(6)  |
| B(3)—O(9)                       | 1.489(6)  | B(4)—O(5)                 | 1.380(6)  |
| B(4)—O(6)                       | 1.371(6)  | B(4)—O(7)                 | 1.353(6)  |
| B(5)—O(9)                       | 1.386(6)  | B(5)—O(10)                | 1.349(6)  |
| B(5)—O(11)                      | 1.371(6)  | B(6)—O(8)                 | 1.455(6)  |
| B(6)—O(11)                      | 1.480(6)  | B(6)—O(12)                | 1.485(6)  |
| B(6)—O(13)                      | 1.483(6)  | B(7) <sup>17</sup> —O(6)  | 1.480(6)  |
| B(7)—O(12)                      | 1.454(6)  | B(7)—O(14)                | 1.473(6)  |
| B(7)—O(15)                      | 1.473(6)  | B(7)—O(6) <sup>18</sup>   | 1.480(6)  |
| B(8)—O(13)                      | 1.371(6)  | B(8)—O(15)                | 1.378(6)  |
| B(8)—O(16)                      | 1.355(6)  | Ag(1)—O(1)                | 2.211(3)  |
| Ag(1)—O(3)                      | 2.139(3)  | Ag(1)—I(1)                | 2.6965(5) |
| Ag(1)—O(12) <sup>6</sup>        | 2.575(3)  | Ag(1) <sup>6</sup> —O(12) | 2.575(3)  |
| Ag(2)—O(1)                      | 2.243(3)  | Ag(2)—O(14) <sup>6</sup>  | 2.292(3)  |
| Ag(2) <sup>6</sup> —O(14)       | 2.292(3)  | Ag(2)—I(2) <sup>2</sup>   | 2.8962(6) |
| Ag(2) <sup>2</sup> —I(2)        | 2.8962(6) | Ag(3) <sup>1</sup> —I(3)  | 2.8532(5) |
| Ag(3)—I(3) <sup>14</sup>        | 2.8532(5) | Ag(3)—O(2)                | 2.387(3)  |
| Ag(3)—O(10) <sup>14</sup>       | 2.346(3)  | Ag(3) <sup>1</sup> —O(10) | 2.346(3)  |
| Ag(4)—O(5)                      | 2.308(3)  | Ag(4)—O(7) <sup>13</sup>  | 2.447(3)  |
| Ag(4) <sup>13</sup> —O(7)       | 2.447(3)  | Ag(4) <sup>1</sup> —I(3)  | 2.8113(5) |
| Ag(4)—I(3) <sup>14</sup>        | 2.8112(5) | Ag(5)—O(4)                | 2.440(3)  |
| Ag(5)—O(7)                      | 2.249(3)  | Ag(5)—O(15) <sup>12</sup> | 2.424(3)  |
| Ag(5) <sup>9</sup> —O(15)       | 2.424(3)  | Ag(6)—O(9)                | 2.255(3)  |
| Ag(6)—O(14) <sup>12</sup>       | 2.404(3)  | Ag(6) <sup>9</sup> —O(14) | 2.404(3)  |
| Ag(6)—I(2) <sup>3</sup>         | 2.7774(5) | Ag(6) <sup>3</sup> —I(2)  | 2.7774(5) |
| Ag(7)—O(10)                     | 2.255(3)  | Ag(7)—O(12) <sup>4</sup>  | 2.449(3)  |



|                           |           |                            |           |
|---------------------------|-----------|----------------------------|-----------|
| Ag(7) <sup>4</sup> —O(12) | 2.449(3)  | Ag(7)—I(2)                 | 2.7408(6) |
| Ag(8)—O(10)               | 2.239(3)  | Ag(8)—O(1) <sup>1</sup>    | 2.559(3)  |
| Ag(8)—O(3) <sup>4</sup>   | 2.306(3)  | Ag(8) <sup>14</sup> —O(1)  | 2.559(3)  |
| Ag(8) <sup>4</sup> —O(3)  | 2.306(3)  | Ag(9)—O(13)                | 2.359(3)  |
| Ag(9)—O(16) <sup>11</sup> | 2.240(3)  | Ag(9) <sup>11</sup> —O(16) | 2.239(3)  |
| Ag(9)—I(3)                | 2.6886(5) | Ag(10)—O(16)               | 2.303(3)  |
| Ag(10)—O(6) <sup>9</sup>  | 2.486(3)  | Ag(10) <sup>12</sup> —O(6) | 2.486(3)  |
| Ag(10)—O(8) <sup>11</sup> | 2.381(3)  | Ag(10) <sup>11</sup> —O(8) | 2.381(3)  |
| Ag(10)—I(1) <sup>8</sup>  | 2.9118(5) | Ag(10) <sup>5</sup> —I(1)  | 2.9118(5) |
| Ag(11)—O(7) <sup>11</sup> | 2.184(6)  | Ag(11) <sup>11</sup> —O(7) | 2.184(6)  |
| Ag(11)—I(1) <sup>4</sup>  | 2.703(9)  | Ag(11) <sup>4</sup> —I(1)  | 2.703(9)  |
| Ag(11)—O(16)              | 2.214(5)  | Ag(12)—O(16)               | 2.372(5)  |
| Ag(12)—O(7) <sup>11</sup> | 2.321(4)  | Ag(12) <sup>11</sup> —O(7) | 2.321(4)  |
| Ag(12)—I(1) <sup>4</sup>  | 2.997(5)  | Ag(12) <sup>4</sup> —I(1)  | 2.997(5)  |
| Ag(12)—I(2) <sup>4</sup>  | 2.916(7)  | Ag(12) <sup>4</sup> —I(1)  | 2.916(7)  |

<sup>1</sup>-1/2+x, -1/2+y, +z, <sup>2</sup>2-x, 1-y, 1-z, <sup>3</sup>3/2-x, 1/2-y, 1-z, <sup>4</sup>1-x, 1-y, 1-z, <sup>5</sup>1/2+x, 3/2-y, -1/2+z,  
<sup>6</sup>3/2-x, 3/2-y, 1-z, <sup>7</sup>-1/2+x, 3/2-y, -1/2+z, <sup>8</sup>-1/2+x, 3/2-y, 1/2+z, <sup>9</sup>-1/2+x, 1/2+y, +z, <sup>10</sup>-1+x, +y, +z,  
<sup>11</sup>1-x, +y, 3/2-z, <sup>12</sup>1/2+x, -1/2+y, +z, <sup>13</sup>2-x, +y, 3/2-z, <sup>14</sup>1/2+x, 1/2+y, +z, <sup>15</sup>1/2+x, 3/2-y, 1/2+z,  
<sup>16</sup>1+x, +y, +z, <sup>17</sup>3/2-x, -1/2+y, 3/2-z, <sup>18</sup>3/2-x, 1/2+y, 3/2-z

**Table S3(a).** Selected bond angles (deg) for **(1)**.

| <b>Bond Angles (deg) for (1)</b>          |            |                                             |          |
|-------------------------------------------|------------|---------------------------------------------|----------|
| O(1)—B(1)—O(2)                            | 117.6(4)   | O(1)—B(1)—O(3)                              | 124.2(5) |
| O(3)—B(1)—O(2)                            | 118.2(4)   | O(4)—B(2)—O(2)                              | 109.1(4) |
| O(4)—B(2)—O(7) <sup>13</sup>              | 111.7(4)   | O(5) <sup>13</sup> —B(2)—O(4)               | 108.7(4) |
| O(5) <sup>13</sup> —B(2)—O(2)             | 111.2(4)   | O(5) <sup>13</sup> —B(2)—O(7) <sup>13</sup> | 109.8(4) |
| O(7) <sup>13</sup> —B(2)—O(2)             | 106.4(4)   | O(4)—B(3)—O(5)                              | 108.4(4) |
| O(4)—B(3)—O(3)                            | 110.0(4)   | O(4)—B(3)—O(6)                              | 109.1(4) |
| O(5)—B(3)—O(3)                            | 110.9(4)   | O(6)—B(3)—O(5)                              | 110.6(4) |
| O(6)—B(3)—O(3)                            | 107.9(4)   | O(8)—B(4)—O(6)                              | 123.0(4) |
| O(8)—B(4)—O(7)                            | 116.8(4)   | O(6)—B(4)—O(7)                              | 120.2(4) |
| O(8)—B(5)—O(8) <sup>3</sup>               | 109.7(5)   | O(9)—B(5)—O(8) <sup>3</sup>                 | 110.9(2) |
| O(9)—B(5)—O(8)                            | 108.71(19) | O(9) <sup>3</sup> —B(5)—O(8)                | 110.9(2) |
| O(9) <sup>3</sup> —B(5)—O(8) <sup>3</sup> | 108.71(19) | O(9)—B(5)—O(9) <sup>3</sup>                 | 107.8(6) |

<sup>1</sup> -x, +y, 1/2-z; <sup>2</sup> 1/2-x, 1/2-y, 1/2-z; <sup>3</sup> 1-x, +y, 1/2-z; <sup>4</sup> -1/2+x, 3/2-y, +z; <sup>5</sup> +x, -1+y, +z;

<sup>6</sup> 1/2-x, -1/2+y, -z; <sup>7</sup> +x, 1+y, +z; <sup>8</sup> -x, 1-y, -z; <sup>9</sup> 1/2-x, 1/2+y, -z; <sup>10</sup> -x, -y, -z;

<sup>11</sup> 1/2+x, 1/2-y, +z; <sup>12</sup> 1/2+x, 3/2-y, +z; <sup>13</sup> -1/2+x, 1/2-y, +z

**Table S3(b).** Selected bond angles (deg) for **(2)**.

| <b>Bond Angles (deg) for (2)</b> |          |                                             |          |
|----------------------------------|----------|---------------------------------------------|----------|
| O(1)—B(1)—O(11)                  | 116.4(3) | O(7) <sup>1</sup> —B(1)—O(1)                | 124.4(3) |
| O(13)—B(1)—O(14)                 | 120.3(7) | O(15)—B(1)—O(14)                            | 117.0(7) |
| O(15)—B(2)—O(13)                 | 122.7(7) | O(13)—B(2)—O(13) <sup>5</sup>               | 104.2(8) |
| O(12)—B(2)—O(13) <sup>5</sup>    | 108.9(3) | O(12)—B(2)—O(13)                            | 110.1(3) |
| O(12) <sup>5</sup> —B(2)—O(13)   | 108.9(3) | O(12) <sup>5</sup> —B(2)—O(13) <sup>5</sup> | 110.1(3) |
| O(12)—B(2)—O(12) <sup>5</sup>    | 114.2(9) | O(6)—B(3)—O(14)                             | 105.7(5) |
| O(7)—B(3)—O(6)                   | 111.2(6) | O(7)—B(3)—O(14)                             | 107.7(6) |
| O(12)—B(3)—O(6)                  | 114.0(6) | O(12)—B(3)—O(14)                            | 110.8(6) |
| O(12)—B(3)—O(7)                  | 107.3(6) | O(11)—B(4)—O(5)                             | 109.9(6) |
| O(11)—B(4)—O(7)                  | 108.9(6) | O(11)—B(4)—O(8)                             | 110.9(6) |
| O(5)—B(4)—O(7)                   | 108.9(6) | O(5)—B(4)—O(8)                              | 109.2(6) |
| O(7)—B(4)—O(8)                   | 109.0(6) | O(6)—B(5)—O(3)                              | 112.8(6) |
| O(6)—B(5)—O(4)                   | 108.7(6) | O(5)—B(5)—O(6)                              | 111.0(6) |
| O(5)—B(5)—O(3)                   | 106.3(6) | O(5)—B(5)—O(4)                              | 109.1(6) |
| O(3)—B(5)—O(4)                   | 108.8(6) | O(3) <sup>5</sup> —B(6)—O(3)                | 114.6(9) |
| O(3) <sup>5</sup> —B(6)—O(2)     | 108.1(3) | O(3) <sup>5</sup> —B(6)—O(2) <sup>5</sup>   | 110.3(3) |
| O(3)—B(6)—O(2) <sup>5</sup>      | 108.1(3) | O(3)—B(6)—O(2)                              | 110.3(3) |
| O(2) <sup>5</sup> —B(6)—O(2)     | 105.0(8) | O(2)—B(7)—O(4)                              | 120.3(7) |
| O(2)—B(7)—O(1)                   | 122.1(7) | O(4)—B(7)—O(1)                              | 117.5(7) |
| O(11)—B(8)—O(1) <sup>2</sup>     | 114.1(6) | O(11)—B(8)—O(15) <sup>3</sup>               | 114.7(6) |
| O(11)—B(8)—O(10)                 | 111.3(6) | O(1) <sup>2</sup> —B(8)—O(15) <sup>3</sup>  | 105.7(6) |
| O(1) <sup>2</sup> —B(8)—O(10)    | 106.7(6) | O(15) <sup>3</sup> —B(8)—O(10)              | 103.5(5) |
| O(8)—B(9)—O(10)                  | 119.8(7) | O(9)—B(9)—O(10)                             | 122.4(7) |
| O(9)—B(9)—O(8)                   | 117.7(7) |                                             |          |

<sup>1</sup> -x, +y, 1/2-z; <sup>2</sup> -1/2+x, -1/2+y, +z; <sup>3</sup> -1/2+x, 1/2+y, +z; <sup>4</sup> 1-x, 1-y, 1-z; <sup>5</sup> 1-x, +y, 1/2-z;  
<sup>6</sup> 1/2-x, 1/2-y, 1-z; <sup>7</sup> 1/2+x, -1/2+y, +z; <sup>8</sup> 1/2-x, 3/2-y, 1-z; <sup>9</sup> +x, 1-y, 1/2+z; <sup>10</sup> +x, 1-y, -1/2+z;  
<sup>11</sup> 1/2-x, -1/2+y, 1/2-z; <sup>12</sup> 1/2-x, 1/2+y, 1/2-z; <sup>13</sup> 1/2+x, 1/2+y, +z

**Table S3(c).** Selected bond angles (deg) for **(3)**.

| <b>Bond Angles (deg) for (3)</b>           |          |                                            |          |
|--------------------------------------------|----------|--------------------------------------------|----------|
| O(1)—B(1)—O(3)                             | 109.7(4) | O(2)—B(1)—O(3)                             | 109.4(4) |
| O(3)—B(1)—O(13) <sup>2</sup>               | 110.6(4) | O(2)—B(1)—O(1)                             | 110.8(4) |
| O(2)—B(1)—O(13) <sup>2</sup>               | 110.1(3) | O(1)—B(1)—O(13) <sup>2</sup>               | 106.2(3) |
| O(6)—B(2)—O(7)                             | 109.3(4) | O(6)—B(2)—O(3)                             | 108.9(4) |
| O(6)—B(2)—O(4)                             | 111.8(4) | O(3)—B(2)—O(7)                             | 107.9(4) |
| O(3)—B(2)—O(4)                             | 111.5(4) | O(4)—B(2)—O(7)                             | 107.3(3) |
| O(4)—B(3)—O(5)                             | 120.6(4) | O(15) <sup>16</sup> —B(3)—O(5)             | 121.5(4) |
| O(15) <sup>16</sup> —B(3)—O(4)             | 117.8(4) | O(6)—B(4)—O(9)                             | 113.0(4) |
| O(6)—B(4)—O(11)                            | 114.8(4) | O(6)—B(4)—O(5)                             | 112.0(4) |
| O(11)—B(4)—O(9)                            | 106.0(4) | O(5)—B(4)—O(9)                             | 105.4(3) |
| O(5)—B(4)—O(11)                            | 104.9(3) | O(9)—B(5)—O(8)                             | 121.4(4) |
| O(9)—B(5)—O(10)                            | 118.4(4) | O(10)—B(5)—O(8)                            | 120.3(4) |
| O(14) <sup>7</sup> —B(6)—O(10)             | 110.2(3) | O(14) <sup>7</sup> —B(6)—O(7) <sup>5</sup> | 106.7(3) |
| O(1) <sup>1</sup> —B(6)—O(7) <sup>5</sup>  | 111.2(3) | O(10)—B(6)—O(7) <sup>5</sup>               | 108.3(4) |
| O(14) <sup>7</sup> —B(6)—O(1) <sup>5</sup> | 112.7(4) | O(10)—B(6)—O(1) <sup>5</sup>               | 107.7(3) |
| O(12)—B(7)—O(11)                           | 121.7(4) | O(13)—B(7)—O(11)                           | 118.0(4) |
| O(12)—B(7)—O(12)                           | 120.3(4) | O(14)—B(8)—O(8) <sup>7</sup>               | 109.8(4) |
| O(14)—B(8)—O(2) <sup>13</sup>              | 113.8(4) | O(14)—B(8)—O(12)                           | 108.8(4) |
| O(2) <sup>13</sup> —B(8)—O(8) <sup>7</sup> | 107.6(4) | O(2) <sup>13</sup> —B(8)—O(12)             | 110.5(4) |
| O(12)—B(8)—O(8) <sup>7</sup>               | 106.1(4) |                                            |          |

<sup>1</sup> -1+x, +y, +z; <sup>2</sup> +x, -1+y, +z; <sup>3</sup> -x, 1-y, 1-z; <sup>4</sup> +x, 1+y, +z; <sup>5</sup> -1+x, 1+y, +z;

<sup>6</sup> 1-x, 2-y, 2-z; <sup>7</sup> 1-x, 2-y, 1-z; <sup>8</sup> 1-x, 1-y, 1-z; <sup>9</sup> 1+x, -1+y, 1+z; <sup>10</sup> 2-x, 1-y, 2-z;

<sup>11</sup> 1+x, -1+y, +z; <sup>12</sup> 2-x, -y, 2-z; <sup>13</sup> 1+x, +y, +z; <sup>14</sup> -x, 2-y, 1-z; <sup>15</sup> -1+x, 1+y, -1+z; <sup>16</sup> 1-x, 1-y, 2-z

**Table S3(d).** Selected bond angles (deg) for **(4)**.

| <b>Bond Angles (deg) for (4)</b>             |          |                               |          |
|----------------------------------------------|----------|-------------------------------|----------|
| O(2)—B(1)—O(3)                               | 119.4(4) | O(1)—B(1)—O(3)                | 123.3(4) |
| O(1)—B(1)—O(2)                               | 117.2(4) | O(4)—B(2)—O(14) <sup>12</sup> | 113.4(4) |
| O(4)—B(2)—O(5) <sup>13</sup>                 | 106.9(3) | O(4)—B(2)—O(2)                | 110.2(3) |
| O(14) <sup>12</sup> —B(2)—O(5) <sup>13</sup> | 110.7(3) | O(2)—B(2)—O(14) <sup>12</sup> | 107.9(3) |
| O(2)—B(2)—O(5) <sup>13</sup>                 | 107.5(3) | O(8)—B(3)—O(9)                | 109.1(3) |
| O(8)—B(3)—O(3)                               | 110.0(4) | O(4)—B(3)—O(8)                | 111.2(4) |
| O(4)—B(3)—O(9)                               | 110.2(4) | O(4)—B(3)—O(3)                | 110.2(3) |
| O(9)—B(3)—O(3)                               | 105.9(3) | O(7)—B(4)—O(5)                | 119.9(4) |
| O(7)—B(4)—O(6)                               | 121.5(4) | O(5)—B(4)—O(6)                | 118.6(4) |
| O(10)—B(5)—O(9)                              | 120.0(4) | O(10)—B(5)—O(11)              | 121.3(4) |
| O(11)—B(5)—O(9)                              | 118.6(4) | O(13)—B(6)—O(12)              | 109.5(3) |
| O(8)—B(6)—O(13)                              | 108.7(4) | O(8)—B(6)—O(12)               | 112.9(4) |
| O(11)—B(6)—O(8)                              | 110.8(3) | O(11)—B(6)—O(13)              | 108.3(4) |
| O(11)—B(6)—O(12)                             | 106.6(4) | O(14)—B(7)—O(6) <sup>18</sup> | 111.0(4) |
| O(14)—B(7)—O(12)                             | 109.4(4) | O(12)—B(7)—O(15)              | 111.6(4) |
| O(12)—B(7)—O(6) <sup>18</sup>                | 109.4(4) | O(15)—B(7)—O(14)              | 107.0(3) |
| O(15)—B(7)—O(6) <sup>18</sup>                | 108.4(4) | O(13)—B(8)—O(15)              | 118.7(4) |
| O(16)—B(8)—O(13)                             | 121.8(4) | O(16)—B(8)—O(15)              | 119.5(4) |

<sup>1</sup>-1/2+x, -1/2+y, +z; <sup>2</sup>2-x, 1-y, 1-z; <sup>3</sup>3/2-x, 1/2-y, 1-z; <sup>4</sup>1-x, 1-y, 1-z; <sup>5</sup>1/2+x, 3/2-y, -1/2+z;  
<sup>6</sup>3/2-x, 3/2-y, 1-z; <sup>7</sup>-1/2+x, 3/2-y, -1/2+z; <sup>8</sup>-1/2+x, 3/2-y, 1/2+z; <sup>9</sup>-1/2+x, 1/2+y, +z; <sup>10</sup>-1+x, +y, +z;  
<sup>11</sup>1-x, +y, 3/2-z; <sup>12</sup>1/2+x, -1/2+y, +z; <sup>13</sup>2-x, +y, 3/2-z; <sup>14</sup>1/2+x, 1/2+y, +z;  
<sup>15</sup>1/2+x, 3/2-y, 1/2+z; <sup>16</sup>1+x, +y, +z; <sup>17</sup>3/2-x, -1/2+y, 3/2-z; <sup>18</sup>3/2-x, 1/2+y, 3/2-z

**Table S4(a).** Fractional Atomic Coordinates ( $\times 10^4$ ) and Equivalent Isotropic Displacement Parameters ( $\text{\AA}^2 \times 10^3$ ) for **(1)**.  $U_{\text{eq}}$  is defined as 1/3 of the trace of the orthogonalized  $U_{ij}$  tensor.

| Atom  | <i>x</i>  | <i>y</i>  | <i>z</i>   | $U_{\text{eq}}^a/\text{\AA}^2$ |
|-------|-----------|-----------|------------|--------------------------------|
| Ag(1) | 0         | 0         | 0          | 44.6(2)                        |
| Ag(2) | 3410.1(6) | 101.6(5)  | 999.5(2)   | 29.39(14)                      |
| Ag(3) | 1643.0(5) | 3795.6(5) | 2636.4(2)  | 23.95(14)                      |
| Ag(4) | 1691.4(5) | 7063.4(5) | 889.3(3)   | 30.10(15)                      |
| B(1)  | 1238(6)   | 3155(6)   | 172(3)     | 11.4(11)                       |
| B(2)  | 409(6)    | 2161(6)   | 1241(3)    | 8.8(10)                        |
| B(3)  | 2719(6)   | 3827(6)   | 1255(3)    | 9.4(10)                        |
| B(4)  | 4976(6)   | 5431(6)   | 1710(3)    | 10.7(11)                       |
| B(5)  | 5000      | 7664(8)   | 2500       | 9.0(14)                        |
| O(1)  | 972(4)    | 3082(4)   | -498.9(17) | 16.1(7)                        |
| O(2)  | 478(4)    | 2104(4)   | 513.9(16)  | 14.2(7)                        |
| O(3)  | 2220(4)   | 4181(4)   | 537.5(16)  | 12.9(7)                        |
| O(4)  | 1392(4)   | 3382(4)   | 1547.3(15) | 9.8(7)                         |
| O(5)  | 3847(3)   | 2567(4)   | 1347.6(16) | 9.3(7)                         |
| O(6)  | 3402(4)   | 5204(4)   | 1586.4(17) | 12.2(7)                        |
| O(7)  | 5953(4)   | 4349(4)   | 1519.2(17) | 12.6(7)                        |
| O(8)  | 5650(4)   | 6689(4)   | 2020.6(17) | 12.7(7)                        |
| O(9)  | 6221(4)   | 8637(4)   | 2845.3(18) | 14.8(8)                        |
| H(9)  | 7030(70)  | 8380(70)  | 2880(30)   | 19(17)                         |

**Table S4(b).** Fractional Atomic Coordinates ( $\times 10^4$ ) and Equivalent Isotropic Displacement Parameters ( $\text{\AA}^2 \times 10^3$ ) for **(2)**.  $U_{\text{eq}}$  is defined as 1/3 of the trace of the orthogonalized  $U_{ij}$  tensor.

| Atom  | Wyckhoff site | $x$        | $y$        | $z$        | $U_{\text{eq}}^a/\text{\AA}^2$ |
|-------|---------------|------------|------------|------------|--------------------------------|
| Ag(1) | <i>8f</i>     | 2482.4(5)  | 6616.7(6)  | 6183.8(3)  | 28.58(18)                      |
| Ag(2) | <i>8f</i>     | 977.8(5)   | 4323.8(6)  | 5441.9(3)  | 26.73(18)                      |
| Ag(3) | <i>8f</i>     | 4524.3(5)  | 4812.7(6)  | 5604.4(3)  | 28.22(19)                      |
| Ag(4) | <i>8f</i>     | 2693.9(6)  | 3051.8(6)  | 4111.0(3)  | 37.3(2)                        |
| Ag(5) | <i>8f</i>     | 5686.6(4)  | 2626.1(6)  | 5174.5(3)  | 19.80(17)                      |
| Ag(6) | <i>8f</i>     | 2373.9(5)  | 3261.4(6)  | 2621.5(3)  | 34.3(2)                        |
| Ag(7) | <i>8f</i>     | 6157.3(4)  | 5642.2(6)  | 3060.2(3)  | 17.93(16)                      |
| Ag(8) | <i>8f</i>     | 1189.5(4)  | 5718.7(6)  | 2577.8(3)  | 17.91(16)                      |
| Cl(1) | <i>8f</i>     | 3683.9(15) | 2800.4(19) | 5210.0(10) | 24.6(5)                        |
| Cl(2) | <i>8f</i>     | 2033.1(14) | 5894.2(18) | 1597.3(9)  | 17.4(5)                        |
| B(1)  | <i>8f</i>     | 5151(6)    | 2606(8)    | 3625(4)    | 9(2)                           |
| B(2)  | <i>4e</i>     | 5000       | 3225(11)   | 2500       | 14(3)                          |
| B(3)  | <i>8f</i>     | 4126(6)    | 4483(8)    | 3279(4)    | 6.0(18)                        |
| B(4)  | <i>8f</i>     | 2732(6)    | 5670(8)    | 3672(4)    | 10(2)                          |
| B(5)  | <i>8f</i>     | 4082(6)    | 6902(8)    | 3268(4)    | 8.6(19)                        |
| B(6)  | <i>4e</i>     | 5000       | 8157(11)   | 2500       | 11(3)                          |
| B(7)  | <i>8f</i>     | 5067(6)    | 8820(8)    | 3609(4)    | 7.6(19)                        |
| B(8)  | <i>8f</i>     | 1051(6)    | 5672(7)    | 4101(4)    | 4.5(18)                        |
| B(9)  | <i>8f</i>     | 2613(6)    | 5772(8)    | 4831(4)    | 12(2)                          |
| O(1)  | <i>8f</i>     | 5342(3)    | 9643(4)    | 4084(2)    | 9.7(12)                        |
| O(2)  | <i>8f</i>     | 5312(3)    | 8993(4)    | 3024(2)    | 11.7(12)                       |
| O(3)  | <i>8f</i>     | 4161(3)    | 7424(4)    | 2641(2)    | 7.9(11)                        |
| O(4)  | <i>8f</i>     | 4502(3)    | 7818(4)    | 3745(2)    | 7.8(11)                        |
| O(5)  | <i>8f</i>     | 3043(3)    | 6759(4)    | 3327(2)    | 8.0(11)                        |
| O(6)  | <i>8f</i>     | 4592(3)    | 5718(4)    | 3368(2)    | 9.0(11)                        |
| O(7)  | <i>8f</i>     | 3100(3)    | 4531(4)    | 3396(2)    | 8.3(11)                        |
| O(8)  | <i>8f</i>     | 3151(3)    | 5760(5)    | 4334(2)    | 17.0(13)                       |
| O(9)  | <i>8f</i>     | 3086(4)    | 5917(4)    | 5395(2)    | 16.7(13)                       |
| O(10) | <i>8f</i>     | 1604(3)    | 5651(4)    | 4737(2)    | 9.2(11)                        |
| O(11) | <i>8f</i>     | 1688(3)    | 5616(4)    | 3630(2)    | 9.1(11)                        |
| O(12) | <i>8f</i>     | 4169(3)    | 3965(4)    | 2657(2)    | 9.0(11)                        |
| O(13) | <i>8f</i>     | 5328(4)    | 2369(4)    | 3025(2)    | 14.7(12)                       |
| O(14) | <i>8f</i>     | 4648(3)    | 3647(4)    | 3766(2)    | 10.5(12)                       |
| O(15) | <i>8f</i>     | 5462(3)    | 1841(4)    | 4105(2)    | 9.8(12)                        |

**Table S4(c).** Fractional Atomic Coordinates ( $\times 10^4$ ) and Equivalent Isotropic Displacement Parameters ( $\text{\AA}^2 \times 10^3$ ) for **(3)**.  $U_{\text{eq}}$  is defined as 1/3 of the trace of the orthogonalized  $U_{ij}$  tensor.

| Atom  | Wyckoff site | <i>x</i>   | <i>y</i>   | <i>z</i>   | $U_{\text{eq}}/\text{\AA}^2$ |
|-------|--------------|------------|------------|------------|------------------------------|
| Ag(1) | <i>2i</i>    | -1066.3(4) | 3774.7(4)  | 6147.5(4)  | 15.93(9)                     |
| Ag(2) | <i>2i</i>    | 535.1(5)   | 10381.3(5) | 6106.5(5)  | 35.53(13)                    |
| Ag(3) | <i>2i</i>    | 3119.4(5)  | 13366.0(5) | 9719.0(3)  | 18.79(10)                    |
| Ag(4) | <i>2i</i>    | 3762.4(5)  | 8829.5(5)  | 5165.8(3)  | 18.04(10)                    |
| Ag(5) | <i>1h</i>    | 5000       | 5000       | 5000       | 33.54(17)                    |
| Ag(6) | <i>2i</i>    | 5435.3(5)  | 4567.2(5)  | 7820.1(4)  | 19.71(10)                    |
| Ag(7) | <i>2i</i>    | 9817.3(5)  | 4194.2(6)  | 8792.0(4)  | 33.22(13)                    |
| Ag(8) | <i>1a</i>    | 10000      | 0          | 10000      | 27.43(15)                    |
| Ag(9) | <i>2i</i>    | 13448.6(5) | -228.0(5)  | 10743.5(4) | 21.12(10)                    |
| Br(1) | <i>2i</i>    | 2613.9(6)  | 8393.1(6)  | 3125.3(5)  | 17.87(12)                    |
| B(1)  | <i>2i</i>    | -229(6)    | 6883(6)    | 6530(4)    | 7.4(10)                      |
| B(2)  | <i>2i</i>    | 2360(6)    | 7059(6)    | 7383(5)    | 7.7(10)                      |
| B(3)  | <i>2i</i>    | 2893(6)    | 6707(6)    | 9683(5)    | 8.5(10)                      |
| B(4)  | <i>2i</i>    | 4216(6)    | 8519(6)    | 8227(4)    | 6.0(9)                       |
| B(5)  | <i>2i</i>    | 3326(6)    | 11524(6)   | 7312(5)    | 7.9(10)                      |
| B(6)  | <i>2i</i>    | 2319(6)    | 14506(6)   | 6615(4)    | 6.4(9)                       |
| B(7)  | <i>2i</i>    | 6950(6)    | 7585(6)    | 7196(4)    | 6.4(9)                       |
| B(8)  | <i>2i</i>    | 7416(6)    | 7374(6)    | 4953(5)    | 7.8(10)                      |
| O(1)  | <i>2i</i>    | 613(3)     | 5144(4)    | 6753(3)    | 7.4(6)                       |
| O(2)  | <i>2i</i>    | -962(4)    | 7405(4)    | 5257(3)    | 8.0(6)                       |
| O(3)  | <i>2i</i>    | 877(4)     | 7807(4)    | 6684(3)    | 9.9(6)                       |
| O(4)  | <i>2i</i>    | 2095(4)    | 6445(4)    | 8698(3)    | 13.8(7)                      |
| O(5)  | <i>2i</i>    | 3865(4)    | 7752(4)    | 9491(3)    | 8.8(6)                       |
| O(6)  | <i>2i</i>    | 3314(4)    | 8192(4)    | 7274(3)    | 7.4(6)                       |
| O(7)  | <i>2i</i>    | 3205(3)    | 5652(4)    | 6817(3)    | 7.8(6)                       |
| O(8)  | <i>2i</i>    | 3201(4)    | 11308(4)   | 6108(3)    | 12.4(7)                      |
| O(9)  | <i>2i</i>    | 3888(4)    | 10258(4)   | 8264(3)    | 10.2(6)                      |
| O(10) | <i>2i</i>    | 2868(4)    | 13024(4)   | 7592(3)    | 9.7(6)                       |
| O(11) | <i>2i</i>    | 5962(4)    | 7945(4)    | 8141(3)    | 11.2(7)                      |
| O(12) | <i>2i</i>    | 6378(4)    | 7718(4)    | 5997(3)    | 10.6(7)                      |
| O(13) | <i>2i</i>    | 8535(4)    | 7073(4)    | 7470(3)    | 10.7(7)                      |
| O(14) | <i>2i</i>    | 7298(4)    | 5861(4)    | 4638(3)    | 7.5(6)                       |
| O(15) | <i>2i</i>    | 7256(4)    | 4117(5)    | 9176(3)    | 18.6(8)                      |
| O(16) | <i>2i</i>    | 11040(4)   | 1846(4)    | 10209(3)   | 20.2(8)                      |
| H(15) | <i>2i</i>    | 7900(200)  | 4400(300)  | 8700(200)  | 420(160)                     |



**Table S4(d).** Fractional Atomic Coordinates ( $\times 10^4$ ) and Equivalent Isotropic Displacement Parameters ( $\text{\AA}^2 \times 10^3$ ) for **(4)**.  $U_{\text{eq}}$  is defined as 1/3 of the trace of the orthogonalized  $U_{ij}$  tensor.

| Atom   | Wyckoff site | <i>x</i>   | <i>y</i>  | <i>z</i>   | $U_{\text{eq}}/\text{\AA}^2$ |
|--------|--------------|------------|-----------|------------|------------------------------|
| Ag(1)  | <i>8f</i>    | 8162.1(3)  | 7006.8(3) | 4191.4(2)  | 23.47(9)                     |
| Ag(2)  | <i>8f</i>    | 10317.2(3) | 6249.2(4) | 4842.3(2)  | 35.44(12)                    |
| Ag(3)  | <i>8f</i>    | 10276.0(3) | 7147.8(3) | 5975.2(2)  | 31.13(11)                    |
| Ag(4)  | <i>8f</i>    | 11037.8(4) | 6413.8(3) | 7843.7(2)  | 34.19(11)                    |
| Ag(5)  | <i>8f</i>    | 8031.3(3)  | 3921.7(3) | 7137.5(2)  | 18.20(8)                     |
| Ag(6)  | <i>8f</i>    | 7593.0(3)  | 2987.0(3) | 5831.0(3)  | 43.53(14)                    |
| Ag(7)  | <i>8f</i>    | 6073.4(3)  | 3488.8(4) | 4686.9(2)  | 30.20(11)                    |
| Ag(8)  | <i>8f</i>    | 3593.6(3)  | 3716.3(3) | 5168.4(2)  | 28.85(10)                    |
| Ag(9)  | <i>8f</i>    | 5974.0(3)  | 4806.9(3) | 7205.7(2)  | 24.66(9)                     |
| Ag(10) | <i>8f</i>    | 3099.9(3)  | 7331.1(3) | 7971.9(2)  | 19.99(9)                     |
| Ag(11) | <i>8f</i>    | 2577(6)    | 5143(11)  | 6853(6)    | 47(2)                        |
| Ag(12) | <i>8f</i>    | 2420(3)    | 5446(4)   | 6690(2)    | 37.8(8)                      |
| I(1)   | <i>8f</i>    | 6547.5(2)  | 6605.0(3) | 3538.3(2)  | 23.06(8)                     |
| I(2)   | <i>8f</i>    | 7957.2(2)  | 4082.5(3) | 4435.9(2)  | 22.45(8)                     |
| I(3)   | <i>8f</i>    | 6255.3(2)  | 2750.2(2) | 6962.8(2)  | 16.64(7)                     |
| B(1)   | <i>8f</i>    | 8475(4)    | 6134(4)   | 5430(2)    | 10.9(9)                      |
| B(2)   | <i>8f</i>    | 9038(3)    | 4946(4)   | 6194.1(19) | 8.6(9)                       |
| B(3)   | <i>8f</i>    | 7177(3)    | 5436(4)   | 6049.7(19) | 9.4(9)                       |
| B(4)   | <i>8f</i>    | 9492(4)    | 4548(4)   | 8151(2)    | 12.0(10)                     |
| B(5)   | <i>8f</i>    | 5635(4)    | 4487(4)   | 5696(2)    | 10.9(9)                      |
| B(6)   | <i>8f</i>    | 5422(4)    | 6172(4)   | 6215(2)    | 10.6(9)                      |
| B(7)   | <i>8f</i>    | 4728(4)    | 8040(4)   | 6339(2)    | 10.5(9)                      |
| B(8)   | <i>8f</i>    | 4180(4)    | 6591(4)   | 6915.5(19) | 11.4(10)                     |
| O(1)   | <i>8f</i>    | 8752(2)    | 6713(3)   | 5014.5(13) | 17.7(7)                      |
| O(2)   | <i>8f</i>    | 9229(2)    | 5663(2)   | 5748.2(12) | 12.3(6)                      |
| O(3)   | <i>8f</i>    | 7496(2)    | 6015(3)   | 5558.4(12) | 13.3(6)                      |
| O(4)   | <i>8f</i>    | 8043(2)    | 5146(2)   | 6386.5(12) | 10.7(6)                      |
| O(5)   | <i>8f</i>    | 10231(2)   | 5210(2)   | 8363.4(12) | 12.6(6)                      |
| O(6)   | <i>8f</i>    | 9433(2)    | 3532(2)   | 8344.7(14) | 17.4(7)                      |
| O(7)   | <i>8f</i>    | 8835(2)    | 4914(3)   | 7768.2(13) | 17.1(7)                      |
| O(8)   | <i>8f</i>    | 6493(2)    | 6095(2)   | 6334.3(12) | 13.6(6)                      |
| O(9)   | <i>8f</i>    | 6641(2)    | 4463(2)   | 5852.6(13) | 13.0(6)                      |
| O(10)  | <i>8f</i>    | 5215(2)    | 3658(2)   | 5427.8(13) | 14.9(7)                      |
| O(11)  | <i>8f</i>    | 5088(2)    | 5369(2)   | 5814.5(13) | 14.9(7)                      |
| O(12)  | <i>8f</i>    | 5113(2)    | 7224(2)   | 5995.3(12) | 11.2(6)                      |
| O(13)  | <i>8f</i>    | 4900(2)    | 5964(2)   | 6709.1(12) | 14.4(7)                      |
| O(14)  | <i>8f</i>    | 4179(2)    | 8841(2)   | 6011.7(12) | 10.1(6)                      |
| O(15)  | <i>8f</i>    | 4021(2)    | 7594(2)   | 6707.3(13) | 16.8(7)                      |
| O(16)  | <i>8f</i>    | 3602(2)    | 6238(3)   | 7303.3(13) | 15.9(7)                      |

**Table S5.** Assignment of the absorption peaks observed in the IR spectra of (1), (2), (3) and (4).

| <b>Mode description of (1)</b>        | <b>Absorption peaks (cm<sup>-1</sup>)</b> |
|---------------------------------------|-------------------------------------------|
| V <sub>as</sub> (BO <sub>3</sub> )    | 1348.00, 1220.72                          |
| V <sub>s</sub> (BO <sub>3</sub> )     | 1031.73, 966.16, 916.02                   |
| V <sub>s</sub> (BO <sub>4</sub> )     | 846.60, 813.81                            |
| δ <sub>out</sub> (BO <sub>3</sub> )   | 684.61, 611.33                            |
| δ(BO <sub>3</sub> , BO <sub>4</sub> ) | 566.97, 534.19                            |
| V <sub>c</sub> (OH)                   | 3278.40                                   |

  

| <b>Mode description of (2)</b>        | <b>Absorption peaks (cm<sup>-1</sup>)</b> |
|---------------------------------------|-------------------------------------------|
| V <sub>as</sub> (BO <sub>3</sub> )    | 1361.50, 1295.93, 1249.65                 |
| V <sub>as</sub> (BO <sub>4</sub> )    | 1143.58, 1116.58                          |
| V <sub>s</sub> (BO <sub>3</sub> )     | 993.16, 931.45, 896.74                    |
| V <sub>s</sub> (BO <sub>4</sub> )     | 829.31, 792.60, 725.11                    |
| δ <sub>out</sub> (BO <sub>3</sub> )   | 663.39, 603.61                            |
| δ(BO <sub>3</sub> , BO <sub>4</sub> ) | 541.90, 457.05                            |

  

| <b>Mode description of (3)</b>        | <b>Absorption peaks (cm<sup>-1</sup>)</b> |
|---------------------------------------|-------------------------------------------|
| V <sub>as</sub> (BO <sub>3</sub> )    | 1292.22, 1247.72                          |
| V <sub>s</sub> (BO <sub>3</sub> )     | 1052.95, 995.09, 892.88                   |
| V <sub>s</sub> (BO <sub>4</sub> )     | 829.24, 790.67, 723.18                    |
| δ <sub>out</sub> (BO <sub>3</sub> )   | 667.25                                    |
| δ(BO <sub>3</sub> , BO <sub>4</sub> ) | 579.83, 534.19, 433.91                    |
| V <sub>c</sub> (OH)                   | 3411.47                                   |

  

| <b>Mode description of (4)</b>        | <b>Absorption peaks (cm<sup>-1</sup>)</b> |
|---------------------------------------|-------------------------------------------|
| V <sub>as</sub> (BO <sub>3</sub> )    | 1340.28, 1261.22, 1216.87                 |
| V <sub>as</sub> (BO <sub>4</sub> )    | 1062.59, 1018.23                          |
| V <sub>s</sub> (BO <sub>3</sub> )     | 875.23                                    |
| V <sub>s</sub> (BO <sub>4</sub> )     | 821.53                                    |
| δ <sub>out</sub> (BO <sub>3</sub> )   | 669.25, 632.53                            |
| δ(BO <sub>3</sub> , BO <sub>4</sub> ) | 555.40                                    |

**Table S6.** Reported inorganic stoichiometric Ag-borates with B–O framework.

| No. | Compounds                                                                        | Space group  | B–O Units                                                                                              | Dimension | Ref.          |
|-----|----------------------------------------------------------------------------------|--------------|--------------------------------------------------------------------------------------------------------|-----------|---------------|
| 1   | $\text{Ag}_7\text{B}_9\text{O}_{16}(\text{OH})_2$                                | $C2/c$       | $\text{B}_{15}\text{O}_{30}(\text{OH})_4$                                                              | 1         | This work (1) |
| 2   | $\text{Ag}_8\text{B}_8\text{O}_{15}\text{Cl}_2$                                  | $C2/c$       | $\text{B}_{18}\text{O}_{40}, \text{B}_{16}\text{O}_{36},$<br>$\text{B}_{12}\text{O}_{26}$              | 2         | This work (2) |
| 3   | $\text{Ag}_8\text{B}_8\text{O}_{15}(\text{OH})\text{Br}$                         | $P \bar{1}$  | $\text{B}_{18}\text{O}_{38}(\text{OH})_2, \text{B}_{16}\text{O}_{36},$<br>$\text{B}_{12}\text{O}_{26}$ | 2         | This work (3) |
| 4   | $\text{Ag}_{11}\text{B}_8\text{O}_{16}\text{I}_3$                                | $C2/c$       | $\text{B}_9\text{O}_{20}$                                                                              | 1         | This work (4) |
| 5   | $\text{AgBO}_2(\text{I})$                                                        | $Pbca$       | $\text{B}_3\text{O}_8$                                                                                 | 1         | 1             |
| 6   | $\text{AgBO}_2(\text{II})$                                                       | $Cc$         | $\text{B}_3\text{O}_8$                                                                                 | 1         | 2             |
| 7   | $\text{Ag}_2\text{O}(\text{B}_2\text{O}_3)_4$                                    | $P2_1/c$     | $\text{B}_5\text{O}_{10}$                                                                              | 3         | 3             |
| 8   | $\text{Ag}_3\text{BO}_3(\text{I})$                                               | $R32$        | $\text{BO}_3$                                                                                          | 0         | 4             |
| 9   | $\text{Ag}_3\text{BO}_3(\text{II})$                                              | $R \bar{3}c$ | $\text{BO}_3$                                                                                          | 0         | 5             |
| 10  | $\text{Ag}_6[\text{B}_{12}\text{O}_{18}(\text{OH})_6] \cdot 3\text{H}_2\text{O}$ | $P2_1/c$     | $\text{B}_{12}\text{O}_{18}(\text{OH})_6$                                                              | 0         | 6             |
| 11  | $\beta\text{-Ag}_2\text{B}_8\text{O}_{13}$                                       | $P2_1/c$     | $\text{BO}_3$                                                                                          | 0         | 7             |
| 12  | $\text{AgB}_3\text{O}_5$                                                         | $Pna2_1$     | $\text{BO}_3, \text{BO}_4$                                                                             | 3         | 8             |
| 13  | $\text{Ag}_3\text{B}_5\text{O}_9$                                                | $P2_12_12_1$ | $\text{BO}_3, \text{BO}_4$                                                                             | 3         | 9             |
| 14  | $\text{Ag}_2\text{B}_4\text{O}_7$                                                | $P2_1/c$     | $\text{BO}_3, \text{BO}_4$                                                                             | 3         | 10            |
| 15  | $\alpha\text{-Ag}_2\text{B}_8\text{O}_{13}$                                      | $P2_1/c$     | $\text{BO}_3$                                                                                          | 0         | 11            |
| 16  | $\beta\text{-Ag}_2\text{B}_8\text{O}_{13}$                                       | $P2_1/c$     | $\text{B}_8\text{O}_{13}$                                                                              | 0         | 12            |
| 17  | $\text{Ag}_{16}\text{B}_4\text{O}_{10}$                                          | $I4_1/a$     | $\text{B}_4\text{O}_{10}$                                                                              | 1         | 13            |
| 18  | $\text{Ag}_3\text{B}_6\text{O}_{10}\text{I}$                                     | $Pnma$       | $\text{B}_6\text{O}_{10}$                                                                              | 3         | 14            |
| 19  | $\text{Ag}_4\text{B}_7\text{O}_{12}\text{Cl}$                                    | $P \bar{1}$  | $\text{B}_4\text{O}_9, \text{B}_3\text{O}_7$                                                           | 2         | 15            |
| 20  | $\text{Ag}_4\text{B}_7\text{O}_{12}\text{Br}$                                    | $P \bar{1}$  | $\text{B}_4\text{O}_9, \text{B}_3\text{O}_7$                                                           | 2         | 15            |
| 21  | $\text{Ag}_4\text{B}_7\text{O}_{12}\text{I}$                                     | $P \bar{1}$  | $\text{B}_4\text{O}_9, \text{B}_3\text{O}_7$                                                           | 2         | 15            |
| 22  | $\text{Ag}_4\text{B}_4\text{O}_7\text{Br}_2$                                     | $P6_122$     | $\text{B}_3\text{O}_8$                                                                                 | 3         | 16            |
| 23  | $\text{Ag}_4\text{B}_4\text{O}_7\text{I}_2$                                      | $P6_122$     | $\text{B}_3\text{O}_8$                                                                                 | 3         | 16            |
| 24  | $\text{Ag}_3\text{B}_6\text{O}_{10}\text{Br}$                                    | $Pnm2_1$     | $\text{B}_6\text{O}_{10}$                                                                              | 3         | 17            |
| 25  | $\text{Ag}_2\text{Cs}[\text{B}_{15}\text{O}_{24}]$                               | $P2_12_12$   | $\text{B}_{15}\text{O}_{24}$                                                                           | 3         | 18            |
| 26  | $\text{AgSr}(\text{B}_7\text{O}_{12})$                                           | $C2/c$       | $\text{B}_7\text{O}_{12}$                                                                              | 2         | 19            |
| 27  | $\text{Ag}_2\text{B}_{10}\text{O}_{14}(\text{OH})_4 \cdot \text{H}_2\text{O}$    | $P \bar{1}$  | $\text{B}_5\text{O}_8(\text{OH})_2$                                                                    | 2         | 20            |
| 28  | $\text{Ag}_2\text{B}_5\text{O}_8(\text{OH}) \cdot \text{H}_2\text{O}$            | $P2_1/c$     | $\text{B}_5\text{O}_{10}(\text{OH})$                                                                   | 1         | 20            |

Figure S1. Rietveld refinement for the powder X-ray diffraction pattern of (1).

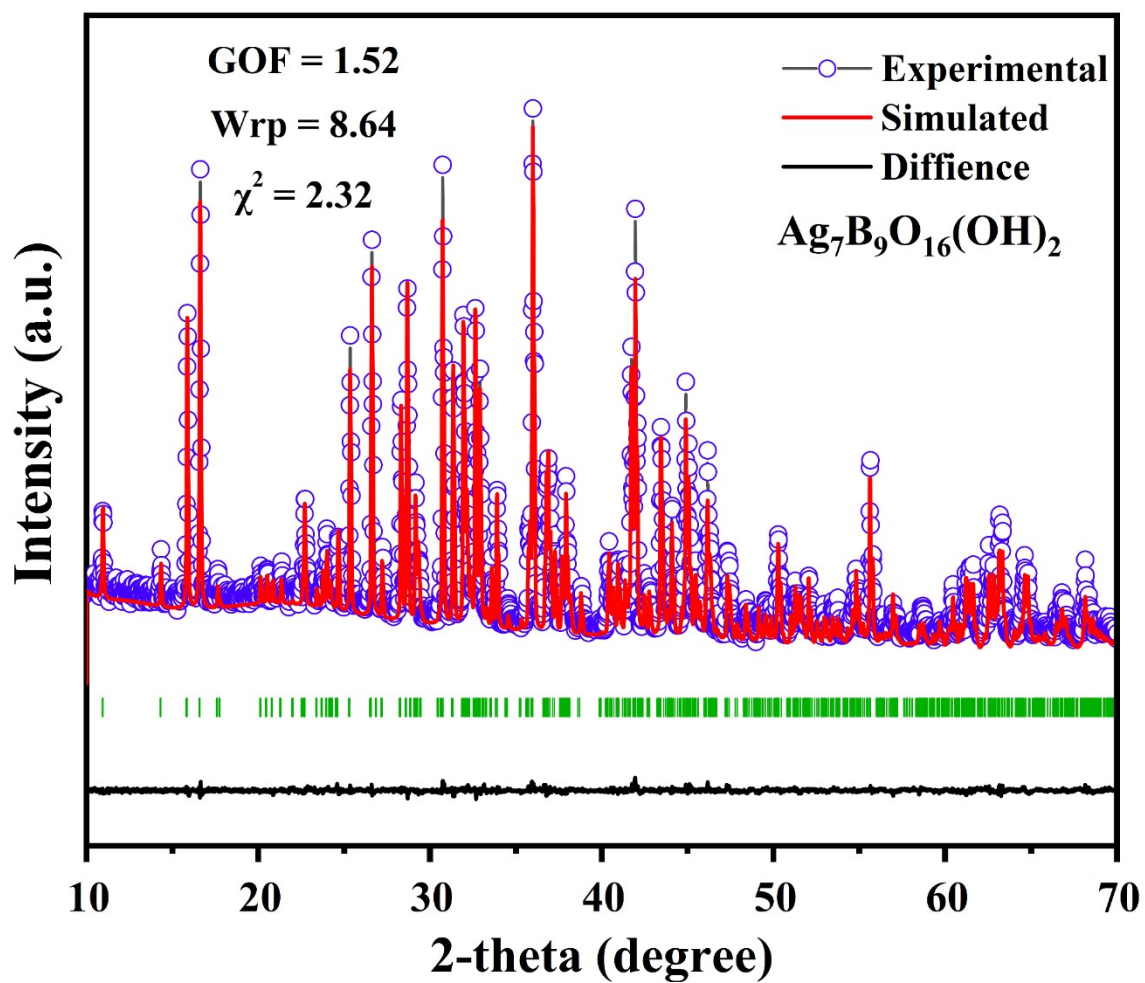

Figure S2. Rietveld refinement for the powder X-ray diffraction pattern of (2).

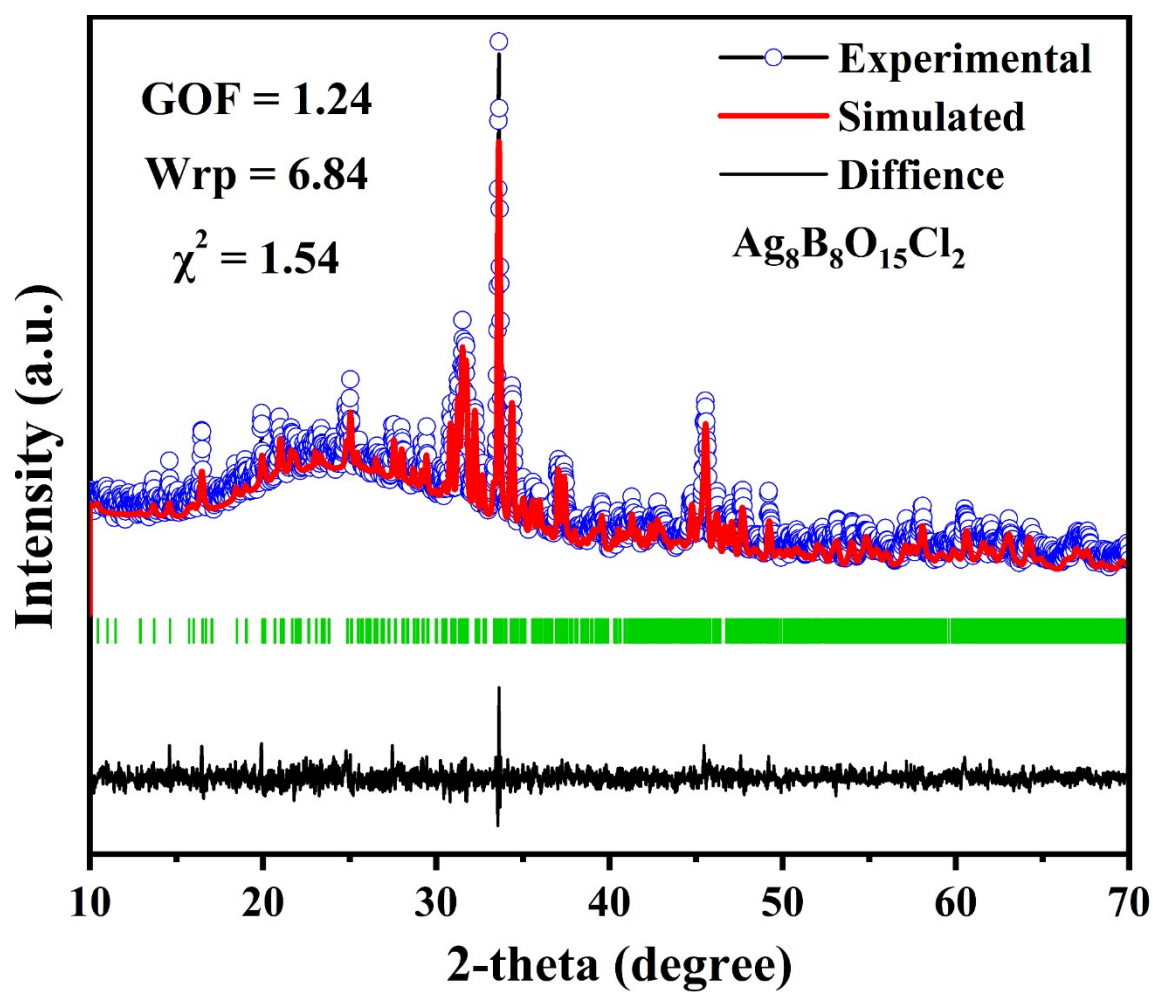

Figure S3. Rietveld refinement for the powder X-ray diffraction pattern of (3).

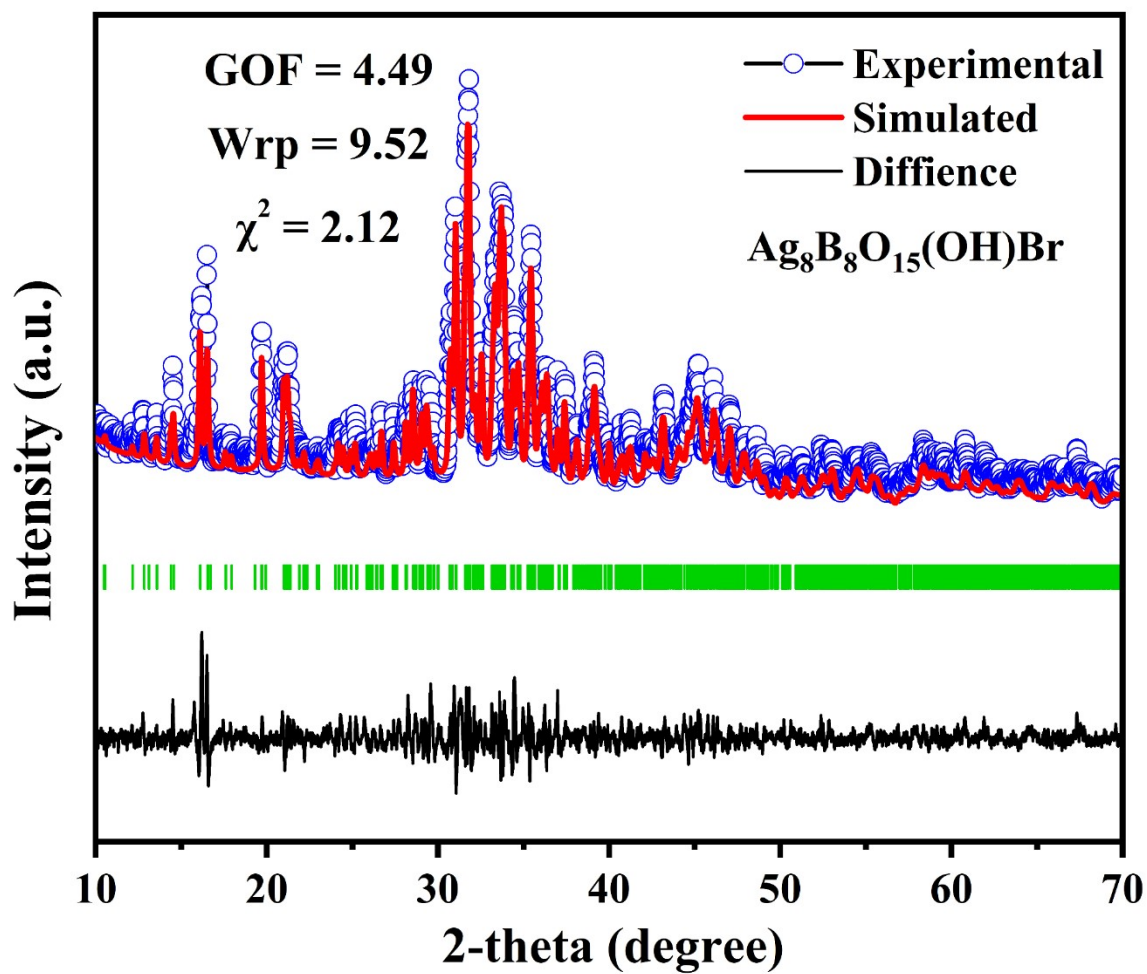

Figure S4. Rietveld refinement for the powder X-ray diffraction pattern of (4).

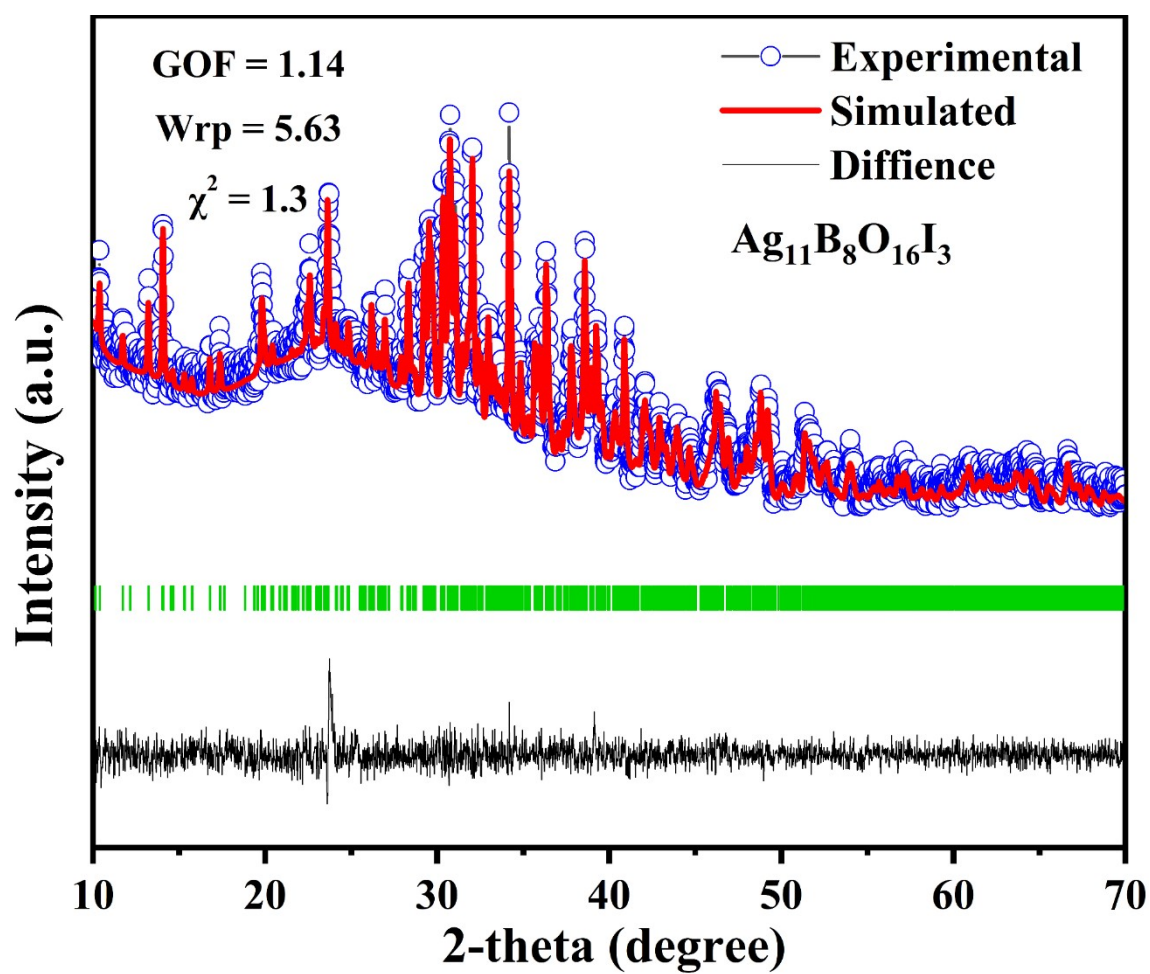

Figure S5. Asymmetric units of (1) to (4), and the coordination environments of atoms.

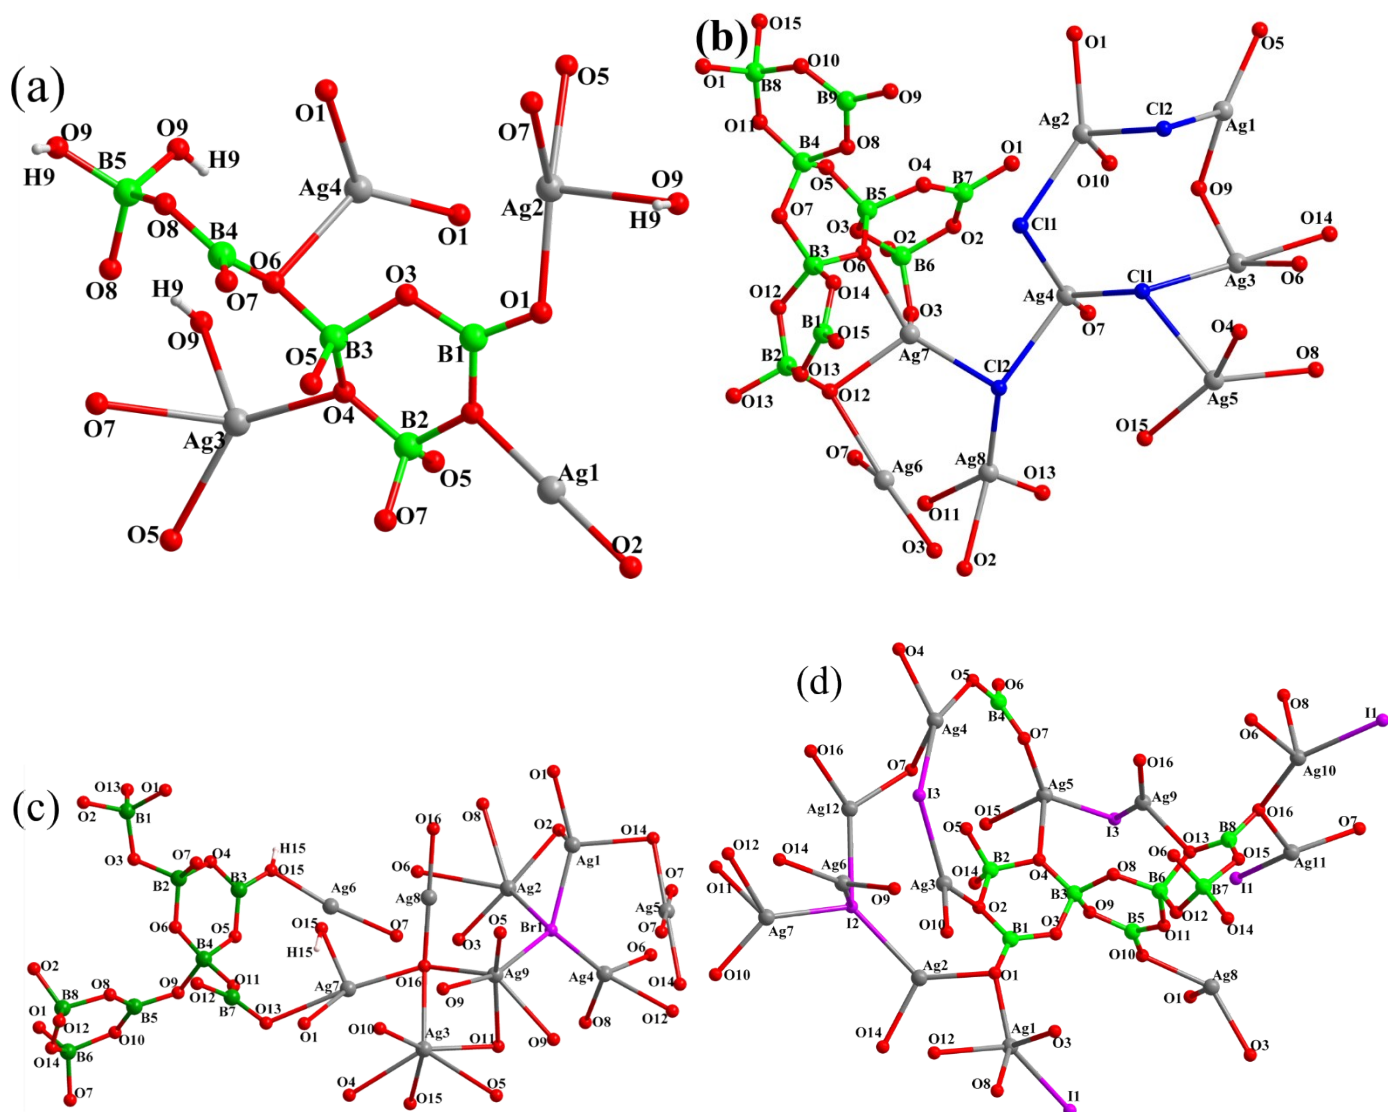



**Figure S6.** (a) 2D structure of **(2)** along the *ab* plane, (b) 12-MR channel, (c) 20-MR channel, and (d) 16-MR channel.

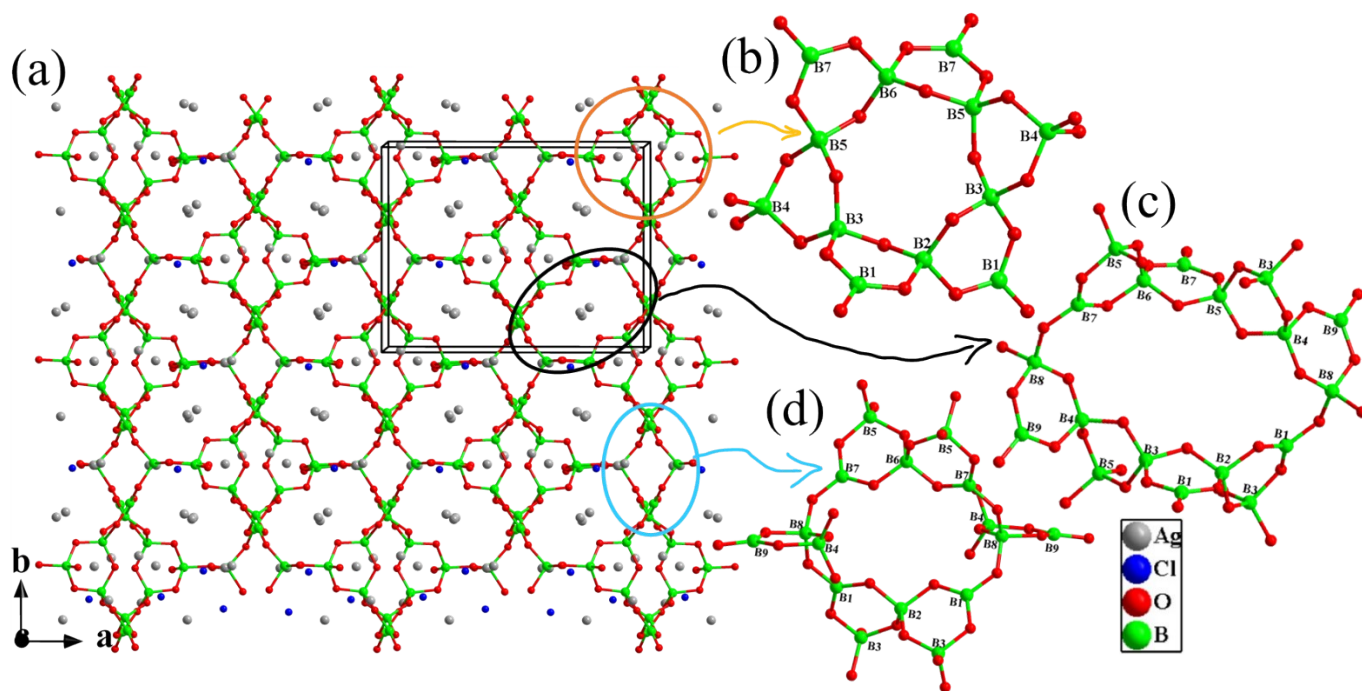

**Figure S7.** (a) 2D structure of **(3)** along the *ab* plane, (b) 12-MR channel, (c) 20-MR channel, and (d) 16-MR channel.

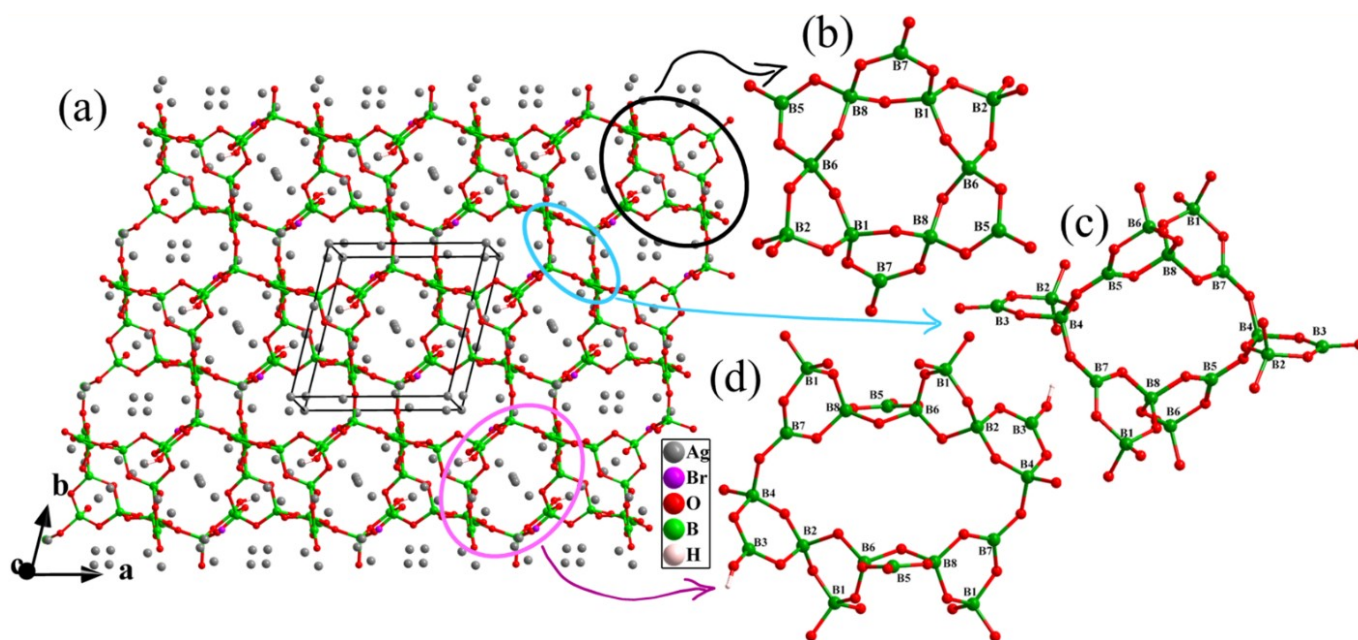

**Figure S8.** The calculated refractive indices of (1), (2), (3) and (4).

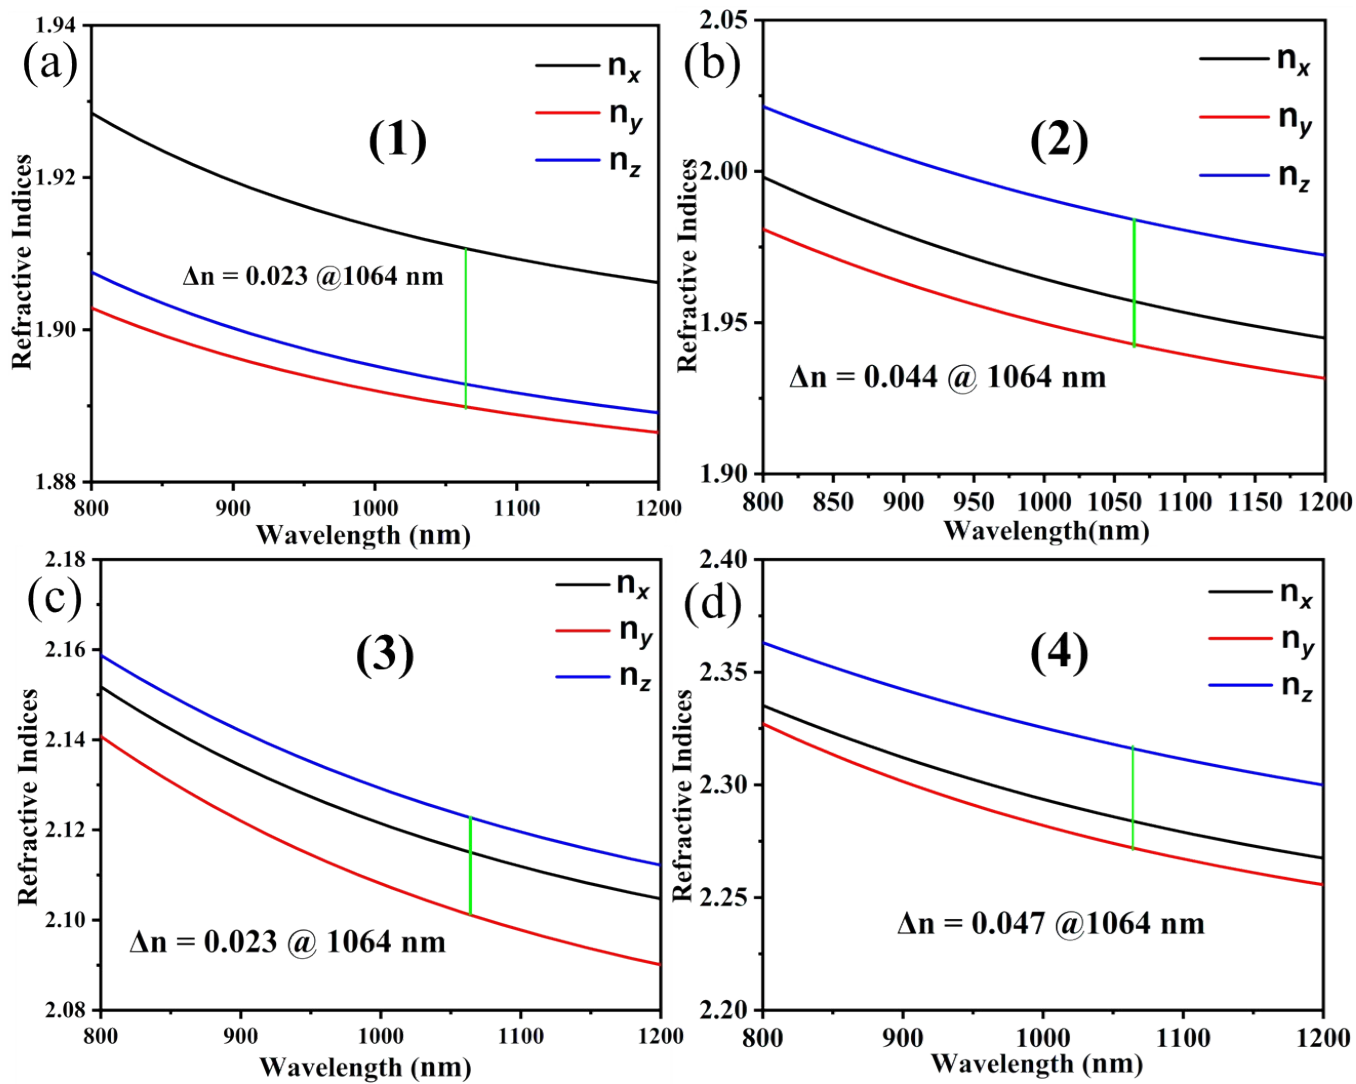

## References:

- 1 Brachtel, G. Jansen, M. Silber(I)-metaborat,  $\text{AgBO}_2$ , *Z. anorg. allg. Chem.* **1981**, 478, 13—19.
- 2 Cerqueira, T. F. T. Lin, S. Amsler, M. Goedecker, S. Botti, S. Identification of Novel Cu, Ag, and Au Ternary Oxides from Global Structural Prediction, *Chem. Mater.* **2015**, 27, 4562—4573.
- 3 Krogh-Moe, J. The crystal structure of silver tetraborate  $\text{Ag}_2\text{O}\cdot 4\text{B}_2\text{O}_3$ , *Acta Cryst.* **1965**, 18, 77—81.
- 4 Jansen, M. Scheld, W. Silber(I)-orthoborat, *Z. anorg. allg. Chem.* **1981**, 477, 85—89.
- 5 Jansen, M. Brachtel, G.  $\text{Ag}_3\text{BO}_3$ -II, eine neue Form von Silber(I)-orthoborat, *Z. anorg. allg. Chem.* **1982**, 489, 42—46.
- 6 Skakibaie-Moghadam, M. Heller, G. Timper, U. Die Kristallstruktur von  $\text{Ag}_6[\text{B}_{12}\text{O}_{18}(\text{OH})_6]\cdot 3\text{H}_2\text{O}$ , einem neuen Dodekaborat, *Z. Krist. Cryst. Mater.* **1990**, 190, 85—96.
- 7 Penin, N. Touboul, M. Nowogrocki, G. Crystal structure of the second form of silver octoborate  $\beta\text{-Ag}_2\text{B}_8\text{O}_{13}$ , *Solid State Sci.* **2003**, 5, 559—564.
- 8 Sohr, G. Falkowski, V. Schauperl, M. L. Liedl, K. R. Huppertz, H. Structure, Thermal Behavior, and Vibrational Spectroscopy of the Silver Borate  $\text{AgB}_3\text{O}_5$ , *Eur. J. Inorg. Chem.* **2015**, 3, 527—533.
- 9 Sohr, G. Falkowski, V. Huppertz, H. The new silver borate  $\text{Ag}_3\text{B}_5\text{O}_9$ , *J. Solid State Chem.* **2015**, 225, 114—119.
- 10 Ziegler, R. Purtscher, F. R. S. Hofer, T. S. Huppertz, H. High-pressure Synthesis, Structure, IR Spectroscopy, and Theoretical Calculations of the New Silver Tetraborate  $\text{Ag}_2\text{B}_4\text{O}_7$  with a Unique Crystal Structure, *Eur. J. Inorg. Chem.* **2023**, e202300120 (1 of 9).
- 11 Krogh-Moe, J. The crystal structure of silver tetraborate  $\text{Ag}_2\text{O}\cdot 4\text{B}_2\text{O}_3$ , *Acta Cryst.* **1965**, 18, 77—81.
- 12 Penin, N. Touboul, M. Nowogrocki, G. Crystal structure of the second form of silver octoborate  $\beta\text{-Ag}_2\text{B}_8\text{O}_{13}$ , *Solid State Sci.* **2003**, 5, 559—564.
- 13 Vegas, A. Jenkins, H. D. B. A re-interpretation of the structure of the silver borate,  $\text{Ag}_{16}\text{B}_4\text{O}_{10}$ , in the light of the extended Zintl–Klemm concept, *Acta Cryst. B*, **2020**. B76, 865—874.
- 14 Du, Z. P. Zhou, Y. Zhao. S. G. Synthesis, Crystal Structure and Birefringence Properties of Silver Cluster Compound  $\text{Ag}_3\text{B}_6\text{O}_{10}\text{I}$ . *Chin. J. of Appl. Chem.* **2023**, 40, 229—235.
- 15 Volkov, S. N. Charkin, D. O. Firsova, V. A. Manelis, L. S. Banaru, A. M. Povolotskiy, A. V. Yuhkno, V. A. Arsent'ev, M. Y. Savchenko, Y. Ugolkov, V. L. Krzhizhanovskaya, M. G. Bubnova, R. S. Aksenov, S. M.  $\text{Ag}_4\text{B}_7\text{O}_{12}\text{X}$  (X = Cl, Br, I) Heptaborate Family: Comprehensive Crystal Chemistry, Thermal Stability Trends, Topology, and Vibrational Anharmonicity, *Inorg. Chem.* **2023**, 62, 30—34.
- 16 Volkov, S. N. Charkin, D. O. Arsent'ev, Y. M. Povolotskiy, A. V. Stefanovich, S. Y. Ugolkov, V. L. Krzhizhanovskaya M. G. Shilovskikh, V. V. Bubnova, R. S. Bridging the Salt-Inclusion and Open-Framework Structures: The Case of Acentric  $\text{Ag}_4\text{B}_4\text{O}_7\text{X}_2$  (X = Br, I) Borate Halides, *Inorg. Chem.* **2020**, 59, 2655—2658.
- 17 Volkov, S. N. Charkin, D. O. Kireev, V. E. Ugolkov, V. L. Krzhizhanovskaya, M. G. Tsvetov, N. S. Vaitieva, Y. A. Aksenov, S. M. Bubnova, R. S. A novel contribution to the  $M_3\text{B}_6\text{O}_{10}\text{X}$  hexaborate family: The new silver compound  $\text{Ag}_3\text{B}_6\text{O}_{10}\text{Br}$  and thermal behavior of  $\text{Ag}_3\text{B}_6\text{O}_{10}(\text{NO}_3)$  and  $\text{Na}_3\text{B}_6\text{O}_{10}\text{I}$ , *Solid State Sci.* **2023**, 145, 107311—107317.
- 18 Wiesch, A. Bluhm, K.  $\text{Ag}_2\text{Cs}[\text{B}_{15}\text{O}_{24}]$ : An Anhydrous Quaternary Silver(I)-Borate with a New Helical Borate Anion. *Z. Naturforsch., B: J. Chem. Sci.* **1998**, 53, 157—160.
- 19 Wiesch, A. Bluhm, K.  $\text{AgSr}(\text{B}_7\text{O}_{12})$ : Das erste wasserfreie quaternäre Silber(I)-Borat mit vierfach koordiniertem Silberion und einem neuartigen Boratanion, *Z. Naturforschung B.* **1997**, 52b, 227—230.
- 20 Volkov, S. N. Aksenov, S. M. Charkin, D. O. Banaru, A. M. Banaru, D. A. Vaitieva, Y. A. Krzhizhanovskaya, M. G. Yamnova, N. A. Kireev, V. E. Gosteva, A. N. Tsvetov, N. S. Savchenko, Y. E. Bubnova, R. S. Preparation of novel silver borates by soft hydrothermal synthesis in sealed tubes: New representatives of larderellite and veatchite families, *Solid State Sci.* **2024**, 148, 107414—107425.
